# Supplementary material
Source: PubMed Central journal article supplement (PMC7406273)
Supplement: jciinsight-5-137112-s044.pdf [file jciinsight-5-137112-s044.pdf]

**MUC1-C DRIVES STEMNESS IN  
PROGRESSION OF COLITIS TO COLORECTAL CANCER**

**Authors:** Wei Li and Ning Zhang, et. al.

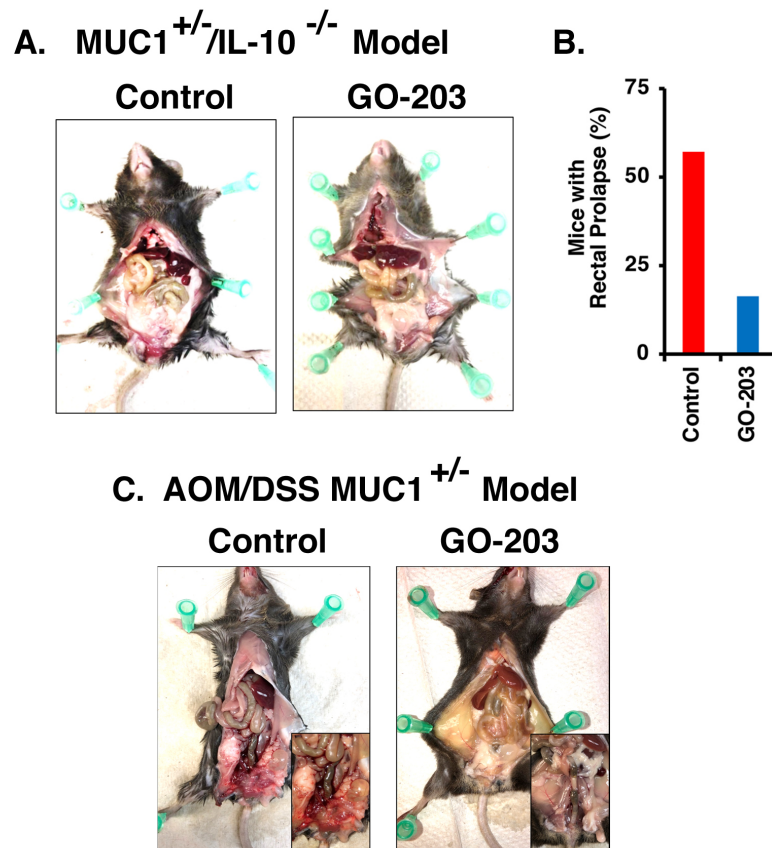

**Supplemental Figure S1. GO-203 treatment decreases inflammation and rectal prolapse.** A. Images of MUC1<sup>+/-</sup>/IL-10<sup>-/-</sup> (day 56) mice left untreated (left) and treated with GO-203 (right) showing rectal prolapse. B. Percentage of MUC1<sup>+/-</sup>/IL-10<sup>-/-</sup> mice left untreated (n=7; blue bar) and treated with GO-203 (n=7; red bar) with rectal prolapse at day 56. Sample size limited detecting a significant difference of proportions between the control and treated groups. C. Images of AOM/DSS-induced MUC1<sup>+/-</sup> (day 68) mice left untreated (left) and treated with GO-203 (right) showing rectal prolapse.

## A. $MUC1^{+/-}/IL-10^{-/-}$

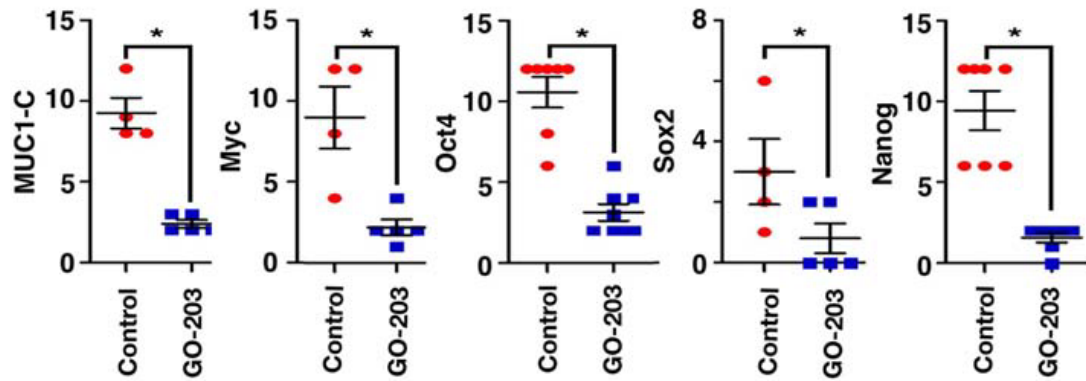

## B. AOM/DSS

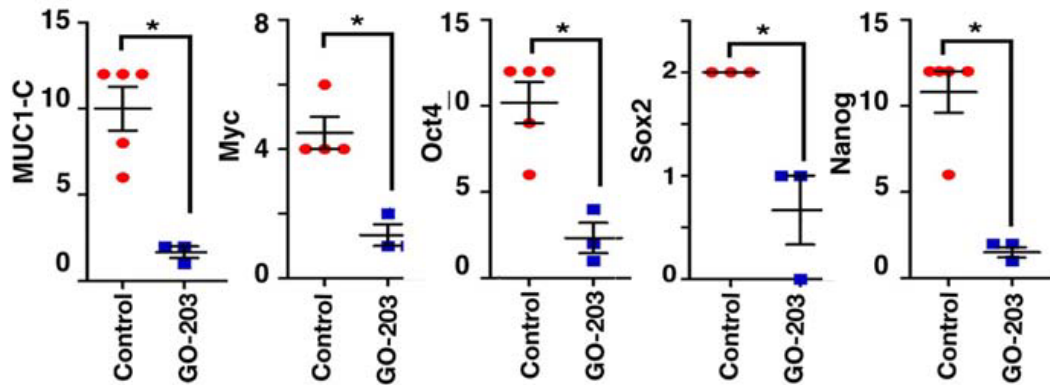

**Supplemental Figure S2. IHC histology scores for control and GO-203-treated mouse colitis tissues.** A. IHC histology scores of colitis tissues from control and GO-203-treated  $MUC1^{+/-}/IL-10^{-/-}$  mice stained for Myc, Oct4, Sox2 and Nanog (Supplemental Table S5). B. IHC histology scores of colitis tissues from control and GO-203-treated AOM/DSS-induced  $MUC1^{+/-}$  mice stained for Myc, Oct4, Sox2 and Nanog (Supplemental Table S6).

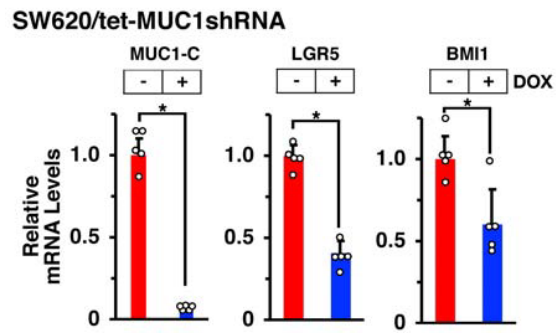

**Supplemental Figure S3. Inducible suppression of MUC1-C mRNA levels in SW620 cells.**

SW620/tet-MUC1shRNA cells treated with vehicle or 500 ng/ml DOX for 7 days were analyzed for the indicated mRNA levels by qRT-PCR using primers listed in Supplemental Table S8. The results (mean $\pm$ SD) are expressed as relative mRNA levels compared to those obtained for vehicle-treated cells (assigned a value of 1).

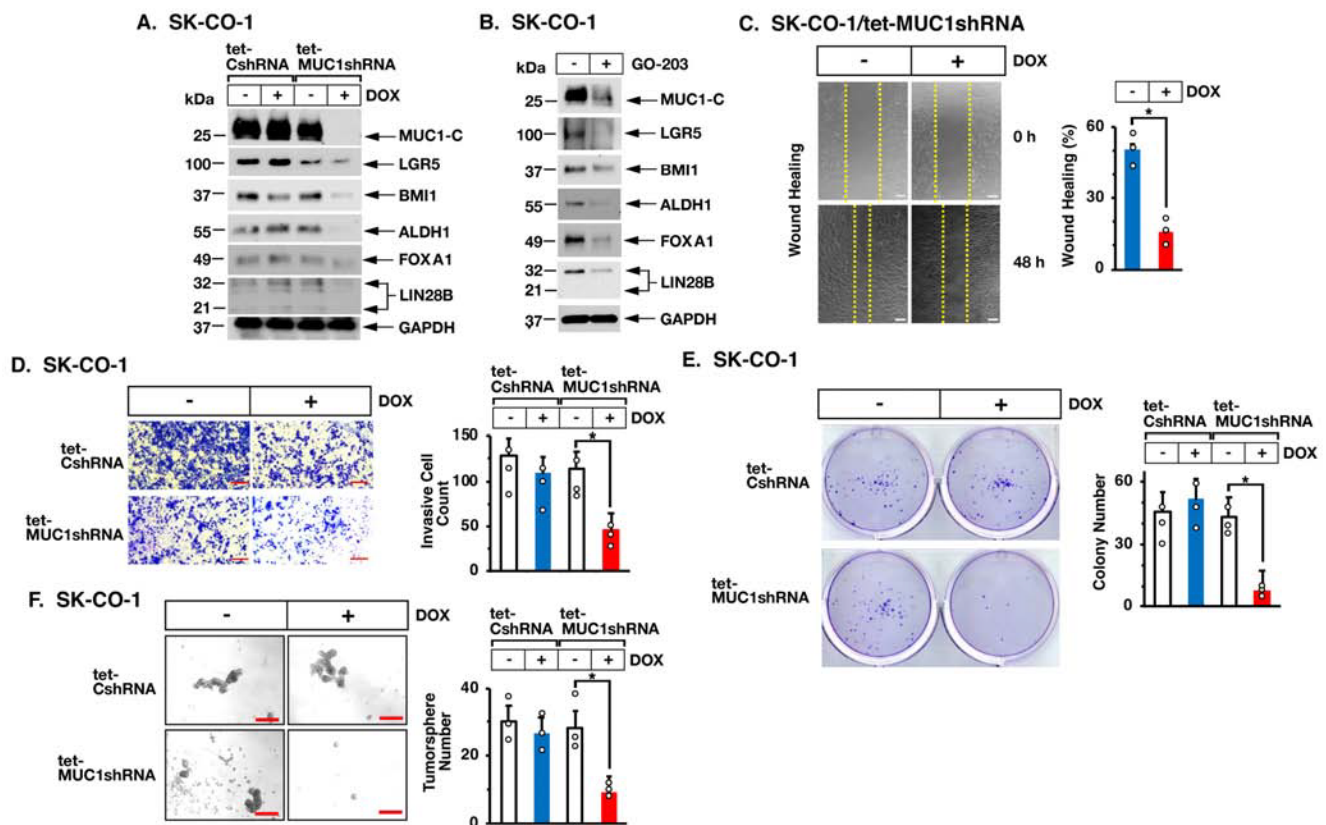

**Supplemental Figure S4. Targeting MUC1-C genetically and pharmacologically suppresses stemness of SK-CO-1 cells.** A. Human SK-CO-1 colon cancer cells stably expressing a tet-CshRNA or tet-MUC1shRNA were treated with vehicle or 500 ng/ml DOX for 7 days. Lysates were immunoblotted with antibodies against the indicated proteins. B. SK-CO-1 cells were left untreated or treated with 5  $\mu$ M GO-203 for 48 h. Lysates were immunoblotted with antibodies against the indicated proteins. C. SK-CO-1/tet-MUC1shRNA cells treated with vehicle or 500 ng/ml DOX for 48 h were monitored for wound healing in the scratch assay (left). The results are expressed as a percentage (mean $\pm$ SD of 3 biologic replicates) of the control at 0 h (right). Scale bars: 100  $\mu$ m. D. SK-CO-1/tet-CshRNA and SK-CO-1/tet-MUC1shRNA cells were treated with vehicle or 500 ng/ml DOX for 24 h were assayed for invasion (left). The results (mean $\pm$ SD of 3 biologic replicates) are expressed as the invasive cell number (right). Scale bar: 200  $\mu$ m. E. SK-CO-1/tet-CshRNA and SK-CO-1/tet-MUC1shRNA cells treated with vehicle or 500 ng/ml DOX for 14 days were assayed for colony formation (left). The results (mean $\pm$ SD of 3 biologic replicates) are expressed as colony number per field (right). F. SK-CO-1/tet-CshRNA and SK-CO-1/tet-MUC1shRNA cells treated with vehicle or 500 ng/ml DOX for 10 days were assayed for tumorsphere formation (left). The results (mean $\pm$ SD of 3 biologic replicates) are expressed as tumorsphere number per field (right). Scale bar: 200  $\mu$ m.

### A. SW620/tet-MUC1shRNA

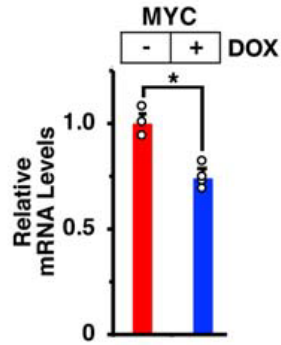

### B. SK-CO-1

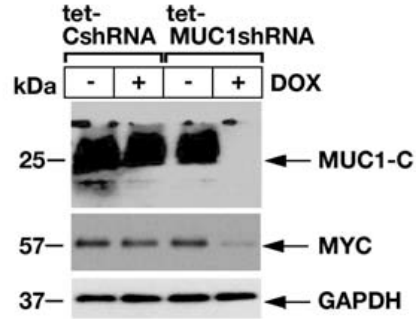

### C. SW620/tet-MYCshRNA

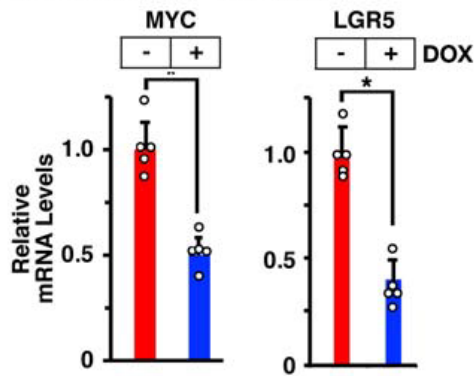

### D. SK-CO-1

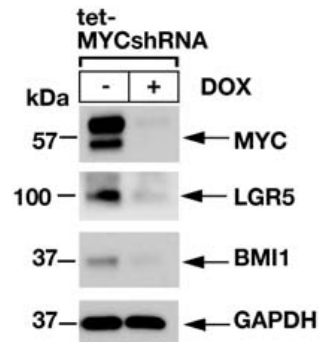

**Supplemental Figure S5. Targeting MUC1-C downregulates MYC expression.** A. SW620/tet-MUC1shRNA cells treated with vehicle or 500 ng/ml DOX for 7 days were analyzed for MYC mRNA levels. The results (mean $\pm$ SD) are expressed as relative mRNA levels compared to those obtained for vehicle-treated cells (assigned a value of 1). B. SK-CO-1/tet-CshRNA and SK-CO-1/tet-MUC1shRNA cells were treated with vehicle or 500 ng/ml DOX for 7 days. Lysates were immunoblotted with antibodies against the indicated proteins. C. SW620/tet-MYCshRNA cells treated with vehicle or 500 ng/ml DOX for 7 days were analyzed for MYC and LGR5 mRNA levels. The results (mean $\pm$ SD) are expressed as relative mRNA levels compared to those obtained for vehicle-treated cells (assigned a value of 1). D. SK-CO-1 cells expressing a tet-MYCshRNA were treated with vehicle or 500 ng/ml DOX for 7 days. Lysates were immunoblotted with antibodies against the indicated proteins.

### A. SK-CO-1

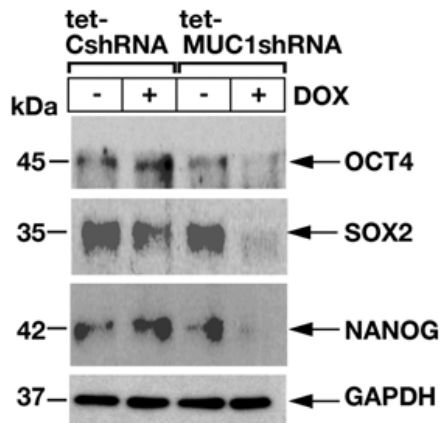

### B. SK-CO-1

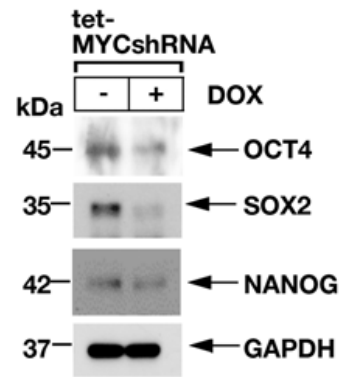

**Supplemental Figure S6. Targeting MUC1-C decreases OSN expression.** A. Lysates from SK-CO-1/tet-MYCshRNA and SK-CO-1/tet-MUC1shRNA cells treated with vehicle or 500 ng/ml DOX were immunoblotted with antibodies against the indicated proteins. B. Lysates from SK-CO-1/tet-MYCshRNA cells treated with vehicle or 500 ng/ml DOX were immunoblotted with antibodies against the indicated proteins.

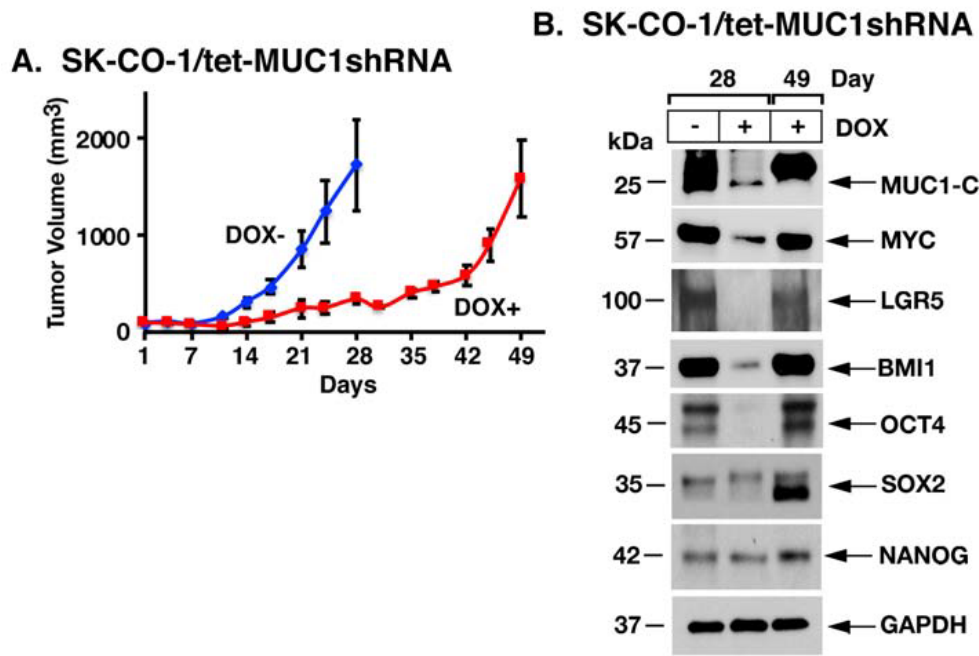

**Supplemental Figure S7. Silencing MUC1-C inhibits SK-CO-1 tumorigenicity and stemness/pluripotency gene expression.** A and B. Six-week old nude male mice were injected subcutaneously in the flank with  $3 \times 10^6$  SK-CO-1/tet-MUC1shRNA cells. Mice were pair-matched into two groups when tumors reached 100-150 mm<sup>3</sup> and were fed without and with DOX. Tumor volumes are expressed as the mean $\pm$ SD for 6 mice (A). Lysates from tumors obtained on the indicated days were immunoblotted with antibodies against the indicated proteins (B).

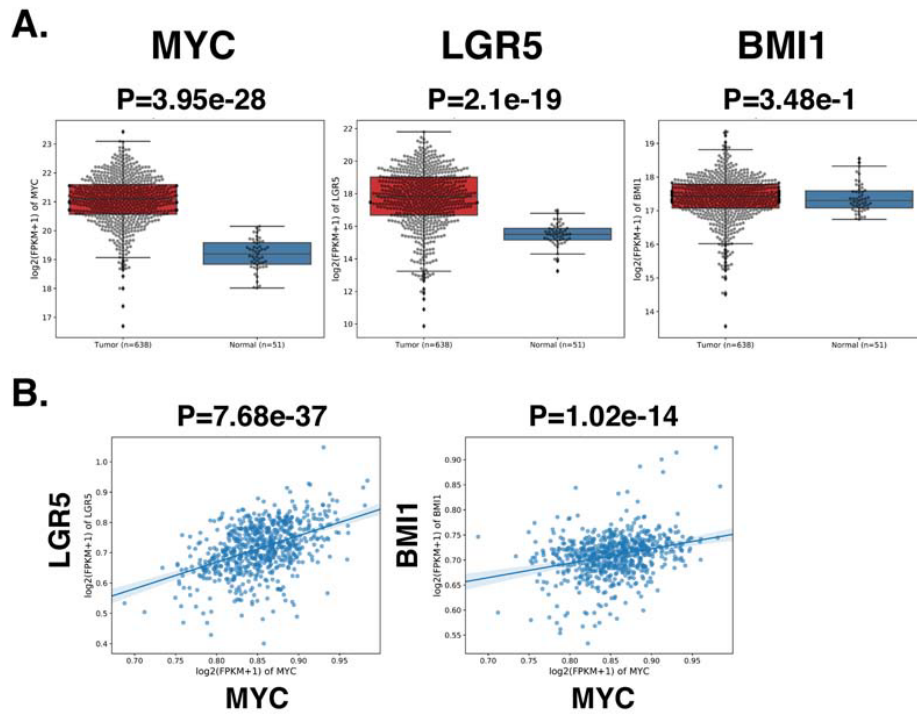

**Supplemental Figure S8. Expression of MUC1, MYC, LGR5 and BMI1 in normal colonic mucosa and CRC.** A. Normal colonic mucosa samples (n=51) were compared to CRC samples (n=638) (Xena gene signature dataset). Multiple probe set IDs for the indicated genes were averaged for each patient sample after normalization to obtain a representative expression value. The center line indicates the median value, bounds of the box denote 25<sup>th</sup> (lower) and 75<sup>th</sup> (upper) percentiles, and whiskers indicate minimum (lower) and maximum (upper) values. Student's t-test was used to compare groups. B. MYC, LGR5 (left) and BMI1 (right) gene expression data from the Xena dataset was assessed for correlation using the Pearson's correlation coefficient.

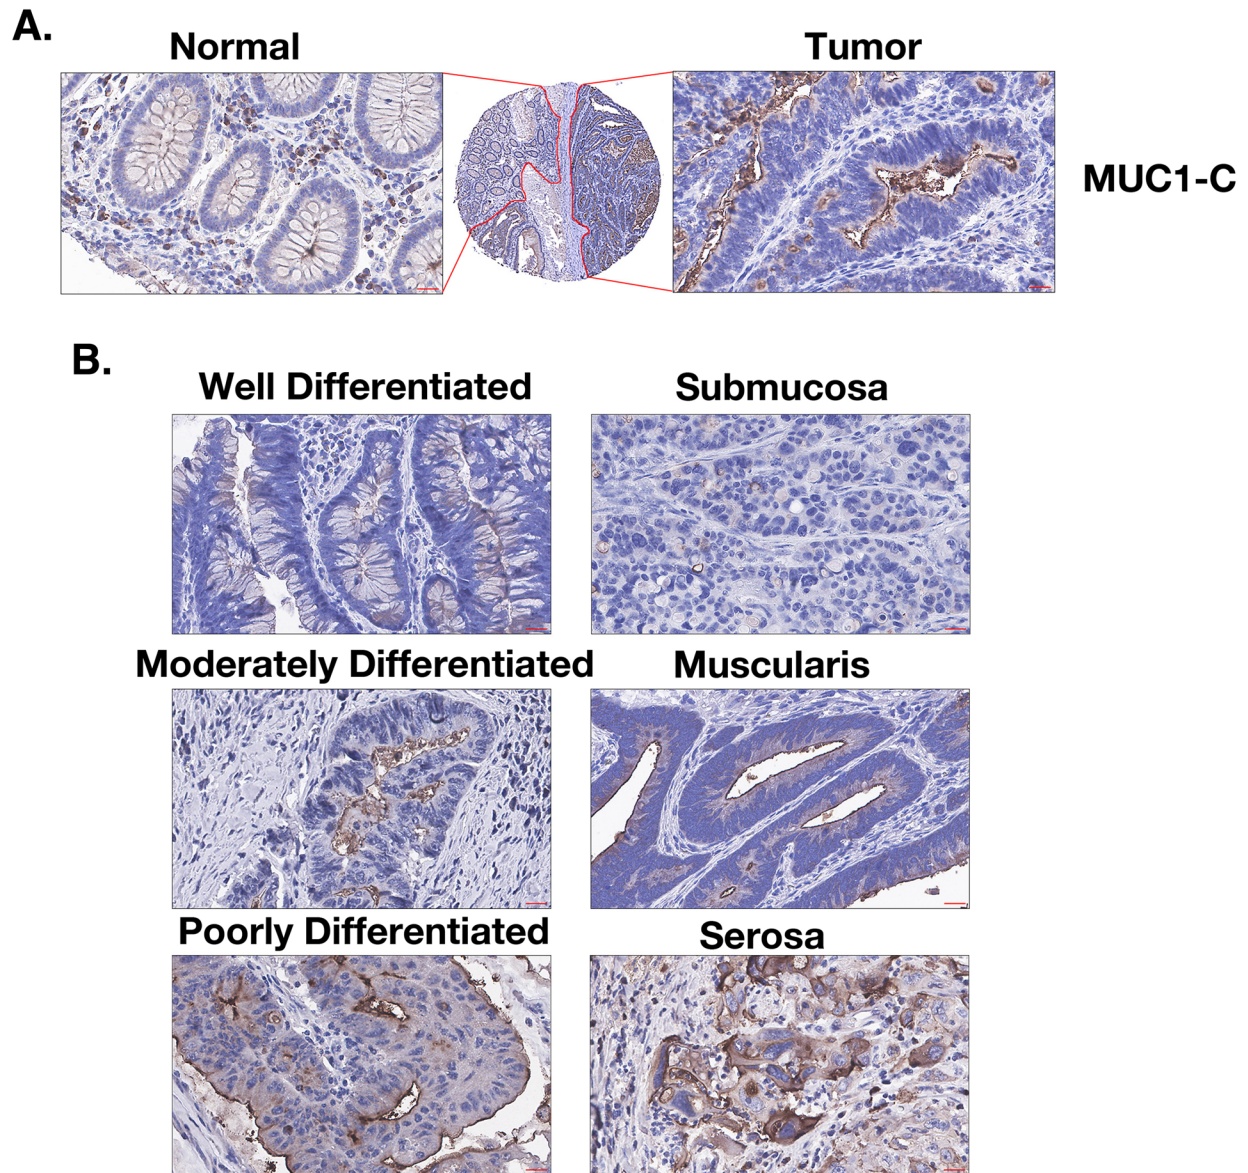

**Supplemental Figure S9. IHC staining of MUC1-C expression in CRCs.** A. Images of adjacent normal (left) and CRC (right) tissues stained for MUC1-C expression. Scale bars: 20  $\mu$ m. B. Images of CRCs with the indicated degrees of differentiation stained for MUC1-C expression (left). Images of CRCs with invasion into the submucosa, muscularis and serosa stained for MUC1-C expression (right). Scale bars: 20  $\mu$ m.

**Supplemental Table S1. Analysis of colon tissues from control and GO-203-treated MUC1<sup>+/-</sup>/IL-10<sup>-/-</sup> mice.**

| Mouse | Group   | Colitis |          |        | Dysplasia |   | Carcinoma |
|-------|---------|---------|----------|--------|-----------|---|-----------|
|       |         | Mild    | Moderate | Severe |           |   |           |
|       |         | 1       | 2        | 3      | 4         | 5 | 6         |
| 132-1 | Control |         |          |        |           |   | √         |
| 132-2 | Control |         |          |        | √         |   |           |
| 149-1 | Control |         |          | √      |           |   |           |
| 149-2 | Control |         |          |        | √         |   |           |
| 171-1 | Control |         |          | √      |           |   |           |
| 171-2 | Control |         |          |        | √         |   |           |
| 171-3 | Control |         |          |        | √         |   |           |
| 133-1 | GO-203  | √       |          |        |           |   |           |
| 133-2 | GO-203  |         | √        |        |           |   |           |
| 150-1 | GO-203  |         | √        |        |           |   |           |
| 150-2 | GO-203  |         |          | √      |           |   |           |
| 170-1 | GO-203  | √       |          |        |           |   |           |
| 170-2 | GO-203  |         | √        |        |           |   |           |
| 150-3 | GO-203  | √       |          |        |           |   |           |

| Frequency of Lesions  |             |            |
|-----------------------|-------------|------------|
|                       | Control (%) | GO-203 (%) |
| Mild inflammation     | 0           | 42.86      |
| Moderate inflammation | 0           | 42.86      |
| Severe inflammation   | 28.57       | 14.29      |
| Dysplasia             | 57.14       | 0          |
| Carcinoma             | 14.28       | 0          |

**Supplemental Table S2. Epithelial damage score data for control and GO-203-treated MUC1<sup>+/-</sup>/IL-10<sup>-/-</sup> mice.**

| Mouse | Epithelial Damage Score |               |
|-------|-------------------------|---------------|
|       | <b>Control</b>          | <b>GO-203</b> |
| 1     | 6                       | 1             |
| 2     | 4                       | 2             |
| 3     | 3                       | 2             |
| 4     | 4                       | 3             |
| 5     | 3                       | 1             |
| 6     | 4                       | 2             |
| 7     | 4                       | 1             |

**Supplemental Table S3. Analysis of colon tissues from control and GO-203-treated AOM/DSS-induced MUC1<sup>+/-</sup> mice.**

| Mouse   | Group   | Colitis |          |        | Dysplasia |   | Carcinoma |
|---------|---------|---------|----------|--------|-----------|---|-----------|
|         |         | Mild    | Moderate | Severe | 4         | 5 |           |
|         |         | 1       | 2        | 3      | 4         | 5 | 6         |
| 00057-1 | Control |         |          |        |           | √ |           |
| 00057-2 | Control |         |          |        |           |   | √         |
| 00057-3 | Control |         |          |        |           |   | √         |
| 00067-2 | Control |         | √        |        |           |   |           |
| 00067-3 | Control |         |          |        |           |   | √         |
| 00067-4 | Control |         |          | √      |           |   |           |
| 00067-5 | Control |         |          |        |           | √ |           |
| 00069-1 | Control |         |          |        | √         |   |           |
| 00069-2 | Control |         |          | √      |           |   |           |
| 00069-3 | Control |         |          |        | √         |   |           |
| 00069-4 | Control |         |          |        |           |   | √         |
| 00058-2 | GO-203  | √       |          |        |           |   |           |
| 00059-1 | GO-203  | √       |          |        |           |   |           |
| 00059-2 | GO-203  |         |          |        |           |   | √         |
| 00059-3 | GO-203  |         | √        |        |           |   |           |
| 00059-4 | GO-203  |         | √        |        |           |   |           |
| 00059-5 | GO-203  |         | √        |        |           |   |           |
| 00060-1 | GO-203  |         | √        |        |           |   |           |
| 00060-2 | GO-203  |         | √        |        |           |   |           |
| 00060-3 | GO-203  |         |          | √      |           |   |           |

| Frequency of Lesions  |             |            |
|-----------------------|-------------|------------|
|                       | Control (%) | GO-203 (%) |
| Slight inflammation   | 0           | 22.2       |
| Moderate inflammation | 9.1         | 55.6       |
| Severe inflammation   | 18.2        | 11.1       |
| Slight dysplasia      | 9.1         | 0          |
| Moderate dysplasia    | 9.1         | 0          |
| Severe dysplasia      | 9.1         | 0          |
| Carcinoma             | 46.0        | 11.1       |

**Supplemental Table S4. Epithelial damage score data from control and GO-203-treated AOM/DSS-induced MUC1<sup>+/-</sup> mice.**

| Mouse | Epithelial Damage Score |        |
|-------|-------------------------|--------|
|       | Control                 | GO-203 |
| 1     | 5                       | 1      |
| 2     | 6                       | 1      |
| 3     | 6                       | 6      |
| 4     | 2                       | 2      |
| 5     | 6                       | 2      |
| 6     | 3                       | 2      |
| 7     | 5                       | 2      |
| 8     | 4                       | 2      |
| 9     | 3                       | 3      |
| 10    | 4                       |        |
| 11    | 6                       |        |

**Supplemental Table S5. IHC score data for control and GO-203-treated MUC1<sup>+/-</sup>/IL-10<sup>-/-</sup> mice.**

| MUC1-C IHC Score |         |                           |        |        |        |      |                    |      |          |        |           |
|------------------|---------|---------------------------|--------|--------|--------|------|--------------------|------|----------|--------|-----------|
| Mouse            | Group   | % Positive Staining Cells |        |        |        |      | Staining Intensity |      |          |        | Sum Score |
|                  |         | ≤10%                      | 11-24% | 25-49% | 50-74% | ≥75% | Negative           | Weak | Moderate | Strong |           |
|                  |         | 0                         | 1      | 2      | 3      | 4    | 0                  | 1    | 2        | 3      |           |
| 1                | Control |                           |        |        |        | √    |                    |      |          | √      | 12        |
| 2                | Control |                           |        |        | √      |      |                    |      |          | √      | 9         |
| 3                | Control |                           |        |        |        | √    |                    |      | √        |        | 8         |
| 4                | Control |                           |        |        |        | √    |                    |      | √        |        | 8         |
| 5                | GO-203  |                           |        | √      |        |      |                    | √    |          |        | 2         |
| 6                | GO-203  |                           |        |        | √      |      |                    | √    |          |        | 3         |
| 7                | GO-203  |                           |        | √      |        |      |                    | √    |          |        | 2         |
| 8                | GO-203  |                           |        |        | √      |      |                    | √    |          |        | 3         |
| 9                | GO-203  |                           |        | √      |        |      |                    | √    |          |        | 2         |
| Myc IHC Score    |         |                           |        |        |        |      |                    |      |          |        |           |
| 1                | Control |                           |        |        |        | √    |                    |      | √        |        | 8         |
| 2                | Control |                           |        |        |        | √    |                    |      |          | √      | 12        |
| 3                | Control |                           |        |        |        | √    |                    | √    |          |        | 4         |
| 4                | Control |                           |        |        |        | √    |                    |      |          | √      | 12        |
| 5                | GO-203  |                           |        | √      |        |      |                    | √    |          |        | 2         |
| 6                | GO-203  |                           |        | √      |        |      |                    | √    |          |        | 2         |
| 7                | GO-203  |                           | √      |        |        |      |                    | √    |          |        | 1         |
| 8                | GO-203  |                           |        | √      |        |      |                    |      | √        |        | 4         |
| 9                | GO-203  |                           |        | √      |        |      |                    | √    |          |        | 2         |
| Oct4 IHC Score   |         |                           |        |        |        |      |                    |      |          |        |           |
| 1                | Control |                           |        |        |        | √    |                    |      |          | √      | 12        |
| 2                | Control |                           |        |        |        | √    |                    |      |          | √      | 12        |
| 3                | Control |                           |        |        |        | √    |                    |      |          | √      | 12        |
| 4                | Control |                           |        |        |        | √    |                    |      |          | √      | 12        |
| 5                | Control |                           |        |        | √      |      |                    |      | √        |        | 6         |
| 6                | Control |                           |        |        |        | √    |                    |      |          | √      | 12        |
| 7                | Control |                           |        |        |        | √    |                    |      | √        |        | 8         |

|                        |         |   |   |   |   |   |   |   |   |   |    |
|------------------------|---------|---|---|---|---|---|---|---|---|---|----|
| 8                      | GO-203  |   |   | √ |   |   |   |   | √ |   | 4  |
| 9                      | GO-203  |   |   | √ |   |   |   | √ |   |   | 2  |
| 10                     | GO-203  |   |   | √ |   |   |   |   | √ |   | 4  |
| 11                     | GO-203  |   |   |   | √ |   |   |   | √ |   | 6  |
| 12                     | GO-203  |   |   | √ |   |   |   | √ |   |   | 2  |
| 13                     | GO-203  |   |   | √ |   |   |   | √ |   |   | 2  |
| 14                     | GO-203  |   |   | √ |   |   |   | √ |   |   | 2  |
| <b>Sox2 IHC Score</b>  |         |   |   |   |   |   |   |   |   |   |    |
| 1                      | Control |   |   | √ |   |   |   |   |   | √ | 6  |
| 2                      | Control |   | √ |   |   |   |   |   |   | √ | 3  |
| 3                      | Control |   | √ |   |   |   |   | √ |   |   | 1  |
| 4                      | Control |   |   | √ |   |   |   | √ |   |   | 2  |
| 5                      | GO-203  |   | √ |   |   |   |   |   | √ |   | 2  |
| 6                      | GO-203  |   | √ |   |   |   | √ |   |   |   | 0  |
| 7                      | GO-203  | √ |   |   |   |   | √ |   |   |   | 0  |
| 8                      | GO-203  |   | √ |   |   |   |   |   | √ |   | 2  |
| 9                      | GO-203  | √ |   |   |   |   | √ |   |   |   | 0  |
| <b>Nanog IHC Score</b> |         |   |   |   |   |   |   |   |   |   |    |
|                        | Control |   |   |   |   | √ |   |   |   | √ | 12 |
| 2                      | Control |   |   |   |   | √ |   |   |   | √ | 12 |
| 3                      | Control |   |   |   |   | √ |   |   |   | √ | 12 |
| 4                      | Control |   |   |   |   | √ |   |   |   | √ | 12 |
| 5                      | Control |   |   |   | √ |   |   |   | √ |   | 6  |
| 6                      | Control |   |   |   | √ |   |   |   | √ |   | 6  |
| 7                      | Control |   |   |   | √ |   |   |   | √ |   | 6  |
| 8                      | GO-203  |   |   | √ |   |   |   | √ |   |   | 2  |
| 9                      | GO-203  |   |   | √ |   |   |   | √ |   |   | 2  |
| 10                     | GO-203  |   | √ |   |   |   | √ |   |   |   | 0  |
| 11                     | GO-203  |   |   | √ |   |   |   | √ |   |   | 2  |
| 12                     | GO-203  |   |   | √ |   |   |   | √ |   |   | 2  |
| 13                     | GO-203  |   | √ |   |   |   |   | √ |   |   | 1  |
| 14                     | GO-203  |   |   | √ |   |   |   | √ |   |   | 2  |

**Supplemental Table S6. IHC score data for control and GO-203-treated AOM/DSS-induced MUC1<sup>+/-</sup> mice.**

| <b>MUC1-C IHC Score</b> |         |                           |        |        |        |      |                    |      |          |        |           |
|-------------------------|---------|---------------------------|--------|--------|--------|------|--------------------|------|----------|--------|-----------|
| Mouse                   | Group   | % Positive Staining Cells |        |        |        |      | Staining Intensity |      |          |        | Sum Score |
|                         |         | ≤10%                      | 11-24% | 25-49% | 50-74% | ≥75% | Negative           | Weak | Moderate | Strong |           |
|                         |         | 0                         | 1      | 2      | 3      | 4    | 0                  | 1    | 2        | 3      |           |
| 1                       | Control |                           |        |        |        | √    |                    |      | √        |        | 8         |
| 2                       | Control |                           |        |        |        | √    |                    |      |          | √      | 12        |
| 3                       | Control |                           |        |        |        | √    |                    |      |          | √      | 12        |
| 4                       | Control |                           |        |        | √      |      |                    |      | √        |        | 6         |
| 5                       | Control |                           |        |        |        | √    |                    |      |          | √      | 12        |
| 6                       | GO-203  |                           | √      |        |        |      |                    | √    |          |        | 1         |
| 7                       | GO-203  |                           |        | √      |        |      |                    | √    |          |        | 2         |
| 8                       | GO-203  |                           |        | √      |        |      |                    | √    |          |        | 2         |
| <b>Myc IHC Score</b>    |         |                           |        |        |        |      |                    |      |          |        |           |
| 1                       | Control |                           |        |        |        | √    |                    | √    |          |        | 4         |
| 2                       | Control |                           |        |        | √      |      |                    |      | √        |        | 6         |
| 3                       | Control |                           |        | √      |        |      |                    |      | √        |        | 4         |
| 4                       | Control |                           |        | √      |        |      |                    |      | √        |        | 4         |
| 5                       | GO-203  |                           | √      |        |        |      |                    | √    |          |        | 1         |
| 6                       | GO-203  |                           |        | √      |        |      |                    | √    |          |        | 2         |
| 7                       | GO-203  |                           | √      |        |        |      |                    | √    |          |        | 1         |
| <b>Oct4 IHC Score</b>   |         |                           |        |        |        |      |                    |      |          |        |           |
| 1                       | Control |                           |        |        | √      |      |                    |      |          | √      | 9         |
| 2                       | Control |                           |        |        |        | √    |                    |      |          | √      | 12        |
| 3                       | Control |                           |        |        |        | √    |                    |      |          | √      | 12        |
| 4                       | Control |                           |        |        | √      |      |                    |      | √        |        | 6         |
| 5                       | Control |                           |        |        |        | √    |                    |      | √        |        | 12        |

|                        |         |   |   |   |   |   |   |   |   |   |    |
|------------------------|---------|---|---|---|---|---|---|---|---|---|----|
| 6                      | GO-203  |   | √ |   |   |   |   | √ |   |   | 1  |
| 7                      | GO-203  |   |   | √ |   |   |   |   | √ |   | 4  |
| 8                      | GO-203  |   |   | √ |   |   |   | √ |   |   | 2  |
| <b>Sox2 IHC Score</b>  |         |   |   |   |   |   |   |   |   |   |    |
| 1                      | Control |   |   | √ |   |   |   | √ |   |   | 2  |
| 2                      | Control |   |   | √ |   |   |   | √ |   |   | 2  |
| 3                      | Control |   |   | √ |   |   |   | √ |   |   | 2  |
| 4                      | GO-203  | √ |   |   |   |   | √ |   |   |   | 0  |
| 5                      | GO-203  |   | √ |   |   |   |   | √ |   |   | 1  |
| 6                      | GO-203  |   | √ |   |   |   |   | √ |   |   | 1  |
| <b>Nanog IHC Score</b> |         |   |   |   |   |   |   |   |   |   |    |
| 1                      | Control |   |   |   |   | √ |   |   |   | √ | 12 |
| 2                      | Control |   |   |   |   | √ |   |   |   | √ | 12 |
| 3                      | Control |   |   |   |   | √ |   |   |   | √ | 12 |
| 4                      | Control |   |   |   | √ |   |   |   | √ |   | 6  |
| 5                      | Control |   |   |   |   | √ |   |   |   | √ | 12 |
| 6                      | GO-203  |   | √ |   |   |   |   | √ |   |   | 1  |
| 7                      | GO-203  |   |   | √ |   |   |   | √ |   |   | 2  |
| 8                      | GO-203  |   |   | √ |   |   |   | √ |   |   | 2  |

**Supplemental Table S7. MUC1-C expression in patient CRC samples.**

| Clinicopathological Characteristics | n  | MUC1-C Staining |         | <i>P</i> |
|-------------------------------------|----|-----------------|---------|----------|
|                                     |    | +               | -       |          |
|                                     |    | n (%)           | n (%)   |          |
| Gender                              |    |                 |         |          |
| Male                                | 40 | 37(52.9)        | 3(4.3)  |          |
| Female                              | 30 | 26(37.1)        | 4(5.7)  |          |
| Age (year)                          |    |                 |         |          |
| < 58                                | 32 | 31(44.3)        | 1(1.4)  |          |
| ≥58                                 | 38 | 32(45.7)        | 6(8.6)  |          |
| Tumor Site                          |    |                 |         |          |
| Colon                               | 52 | 48(68.6)        | 4(5.7)  |          |
| Rectum                              | 18 | 15(21.4)        | 3(4.3)  |          |
| Tumor Type                          |    |                 |         |          |
| Adenocarcinoma                      | 61 | 55(78.6)        | 6(8.6)  |          |
| Mucinous Adenocarcinoma             | 9  | 8(11.4)         | 1(1.4)  |          |
| Tumor Size (cm)                     |    |                 |         |          |
| < 5.0                               | 31 | 28(40.0)        | 3(4.3)  |          |
| ≥ 5.0                               | 39 | 35(50.0)        | 4(5.7)  |          |
| Differentiation                     |    |                 |         |          |
| Well                                | 15 | 10(14.3)        | 5(7.14) | 0.004*   |
| Moderate + Poor                     | 55 | 53(75.7)        | 2(2.9)  |          |
| Invasive Depth                      |    |                 |         |          |
| Submucosa + Muscularis              | 15 | 10(14.3)        | 5(7.1)  | 0.004*   |
| Serosa                              | 55 | 53(75.7)        | 2(2.9)  |          |
| TNM Stage                           |    |                 |         |          |
| I                                   | 12 | 7(10.0)         | 5(7.1)  | 0.026*   |
| II+III+IV                           | 58 | 51(72.9)        | 7(10.0) |          |

Chi-square test, \* p<0.05

**Supplemental Table S8. Primers used for qRT-PCR.**

| <b>Primer</b> | <b>Forward</b>         | <b>Reverse</b>         |
|---------------|------------------------|------------------------|
| MUC1-C        | AGACGTCAGCGTGAGTGATG   | GCCAAGGCAATGAGATAGAC   |
| MYC           | TTCGGGTAGTGGAAAACCAG   | AGTAGAAATACGGCTGCACC   |
| LGR5          | CTGTGCATTTGGAGTGTGTGAG | GGTCTTCCTCAAAGTCAAGCAG |
| BMI1          | TTCATTTTCTGCTGAACGACT  | AGGTGGGGATTAGCTCAGTG   |
| OCT4          | AGTCAGTGAACAGGGAATGG   | TCGGGATTCAAGAACCTCG    |
| SOX2          | GAGAGAAAGAAAGGGAGAGAAG | GAGAGAGGCAAACTGGAATC   |
| NANOG         | AGATGCCTCACACGGAGACT   | GGACTGGTGGAAGAATCAGG   |
| GAPDH         | CCATGGAGAAGGCTGGGG     | CAAAGTTGTCATGGATGACC   |

**Supplemental Table S9. Primers used for ChIP-PCR.**

| <b>Primer</b>  | <b>Forward</b>         | <b>Reverse</b>           |
|----------------|------------------------|--------------------------|
| LGR5-Promoter  | CTGTCACTCTGGCATCGATTTA | CTGCTGCCTTCCTATCTCTTG    |
| BMI1-Promoter  | GGCCTGACTACACCGACACT   | GCTGAAGGCAGAGTGGAAAC     |
| GAPDH-Promoter | TACTAGCGGTTTTACGGGCG   | TCGAACAGGAGGAGCAGAGAGCGA |

Full unedited gel for Figure 3C

MUC1-C

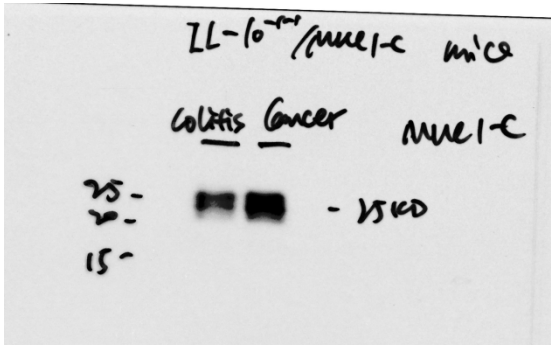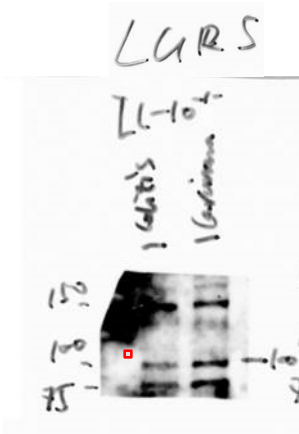

Lgr5

Bmi1

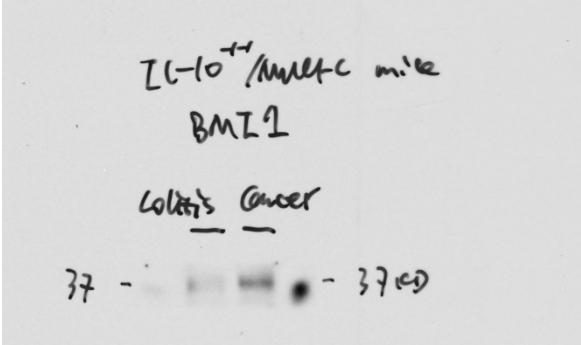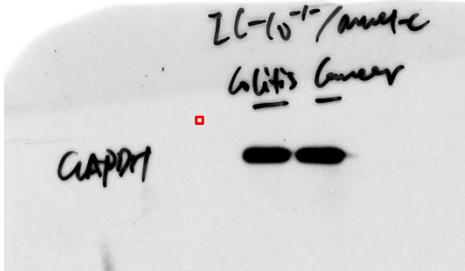

GAPDH

# Full unedited gel for Figure 3E

MUC1-C

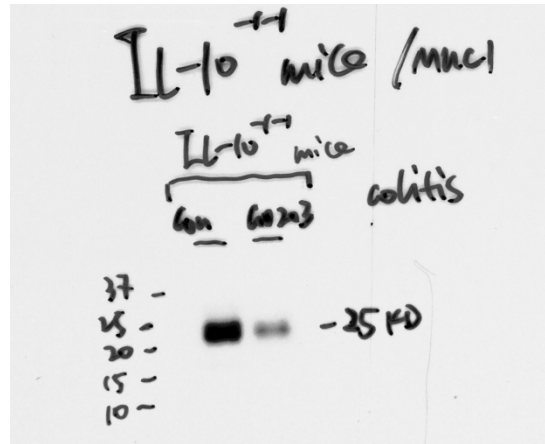

Lgr5

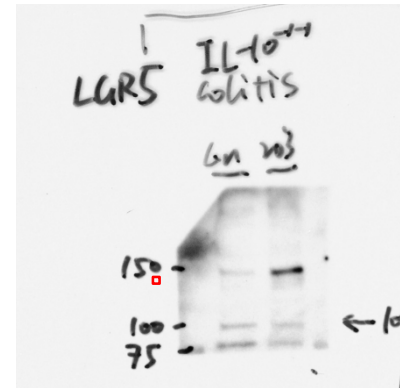

Bmi1

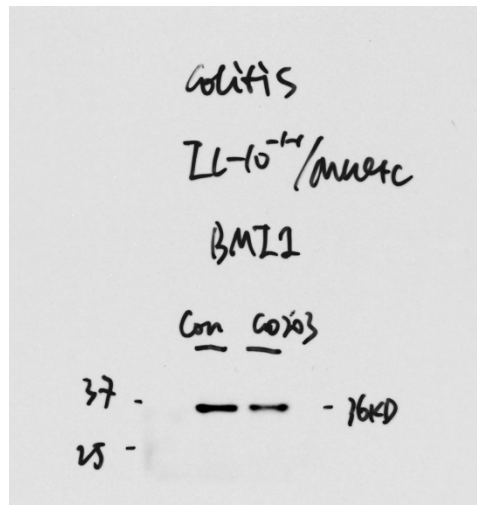

GAPDH

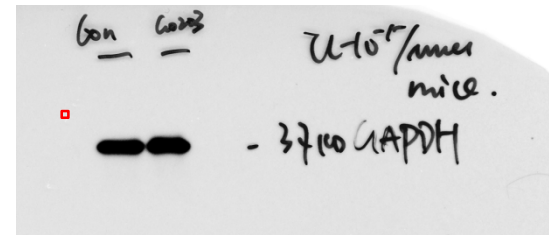

# Full unedited gel for Figure 3G

MUC1-C

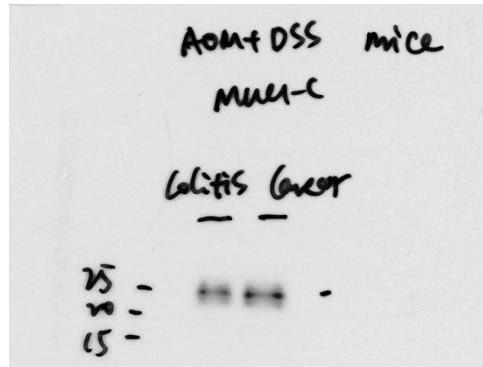

Bmi1

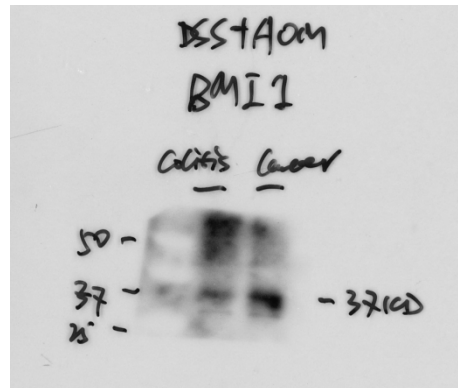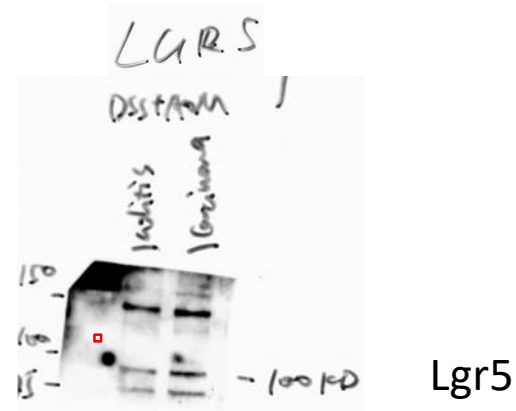

Lgr5

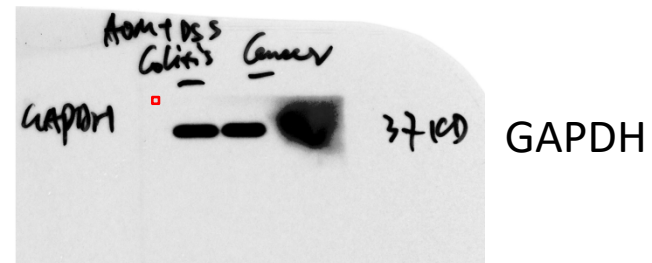

GAPDH

# Full unedited gel for Figure 3I

MUC1-C

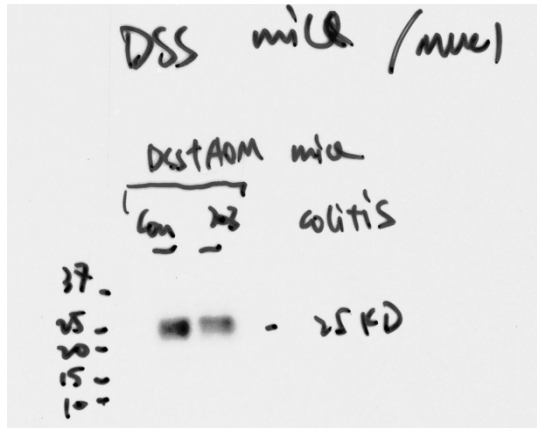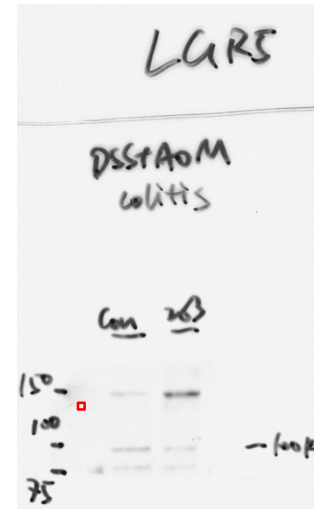

Lgr5

Bmi1

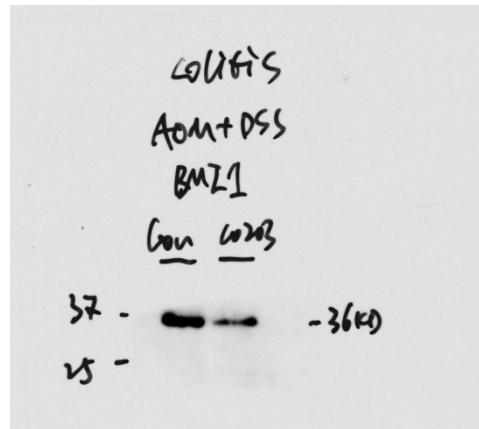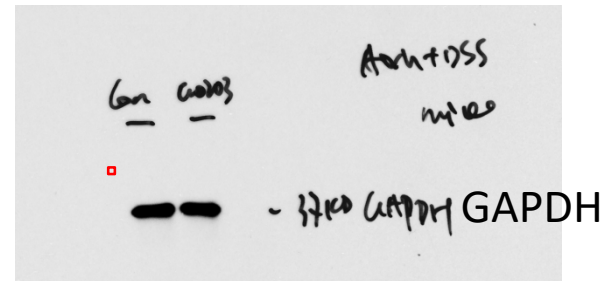

# Full unedited gel for Figure 4B

Myc

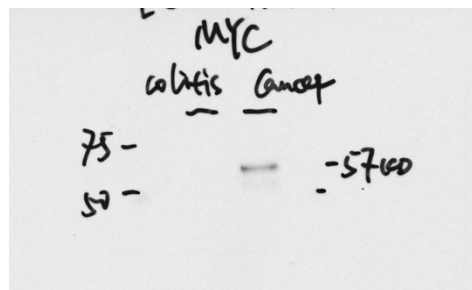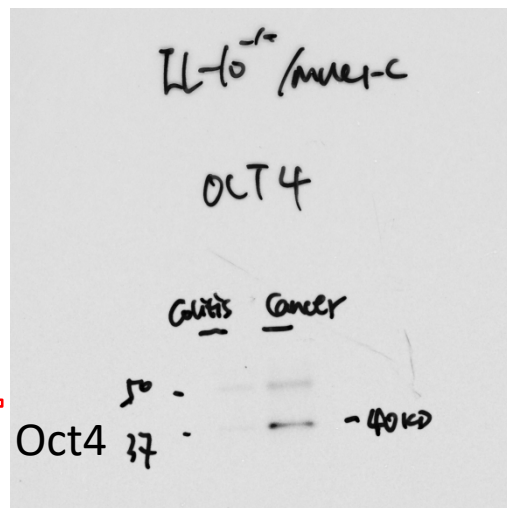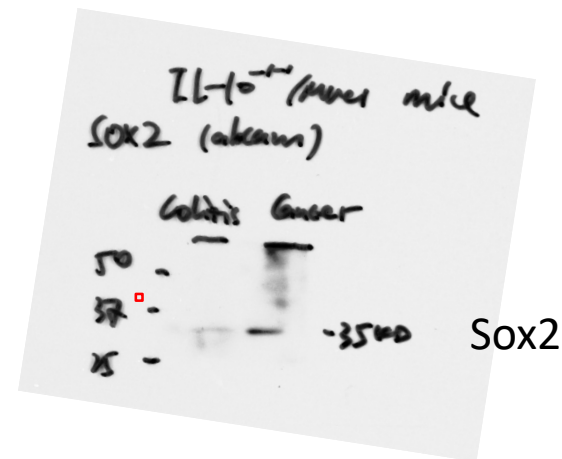

Nanog

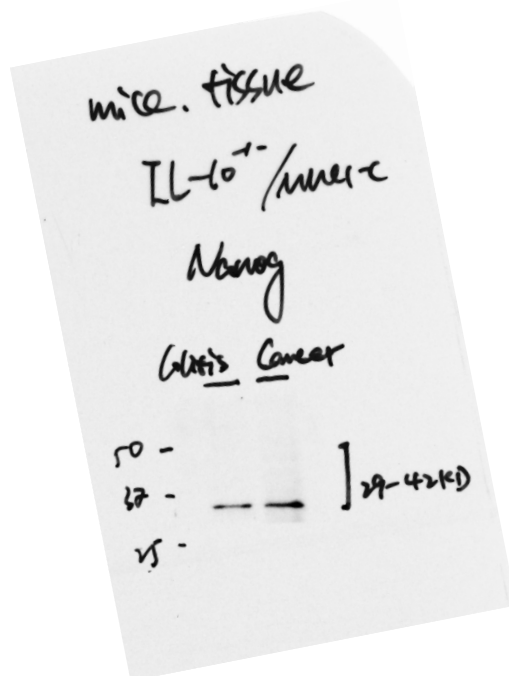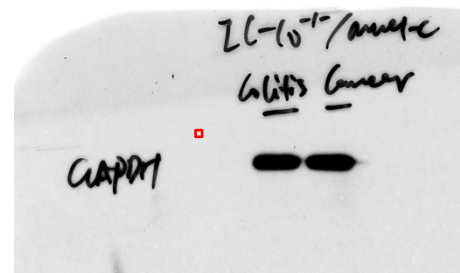

GAPDH

# Full unedited gel for Figure 4D

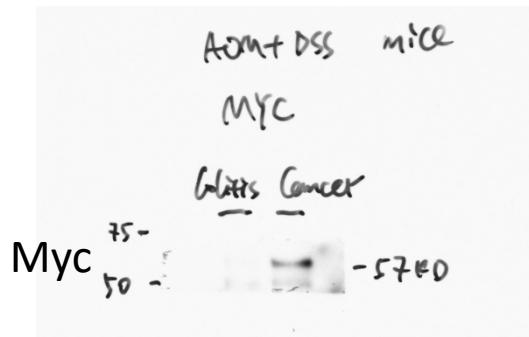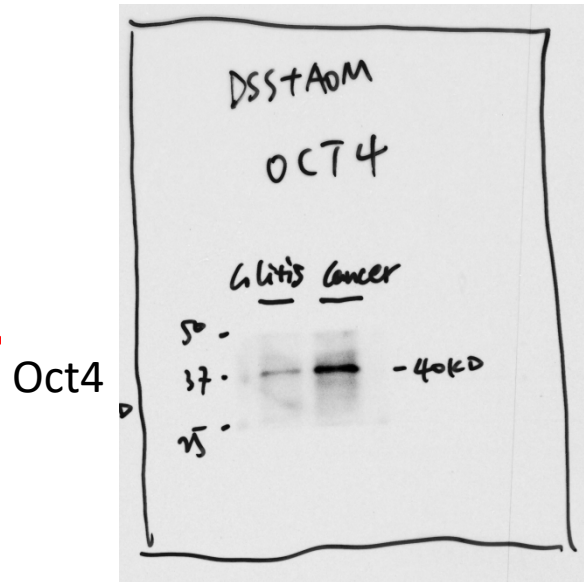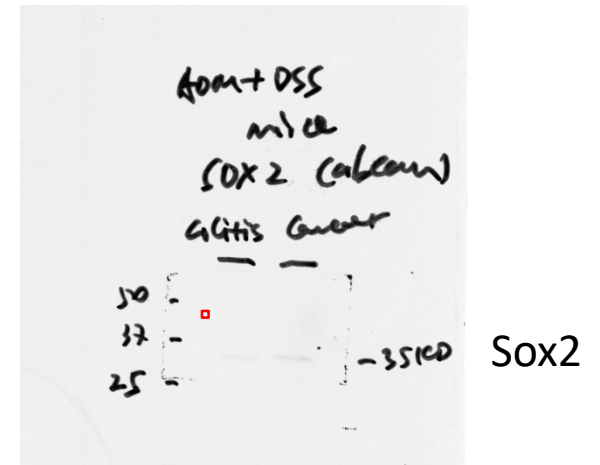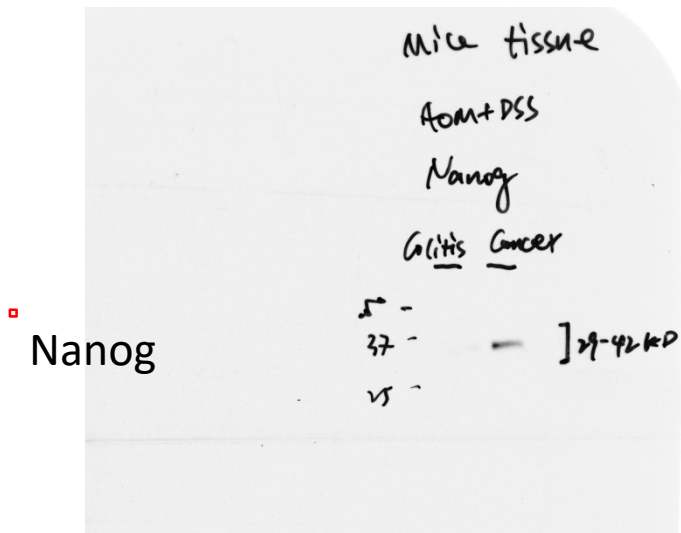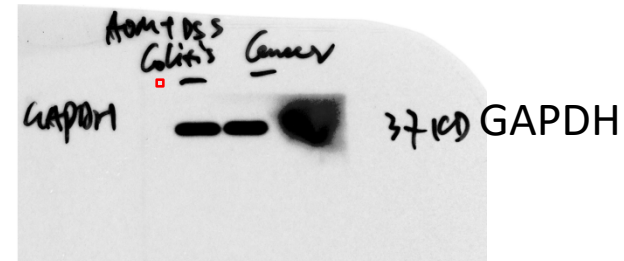

# Full unedited gel for Figure 4F

Myc

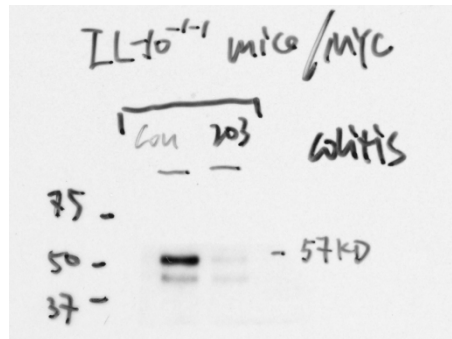

Oct4

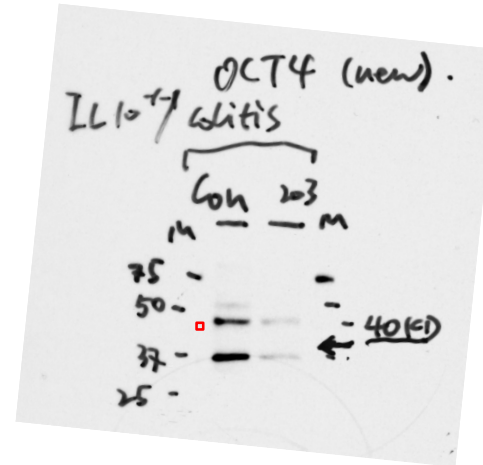

Nanog

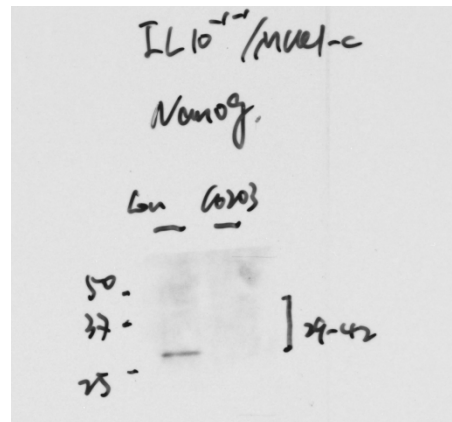

GAPDH

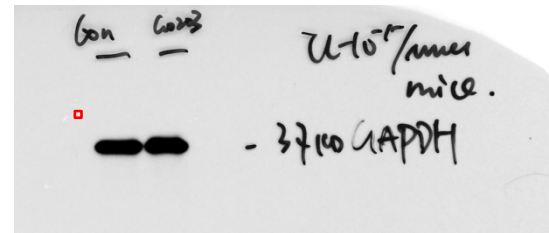

# Full unedited gel for Figure 4H

Myo

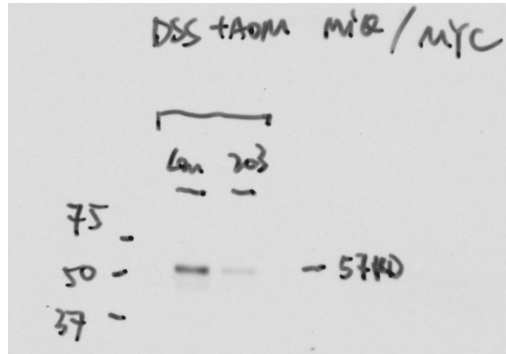

Oct4

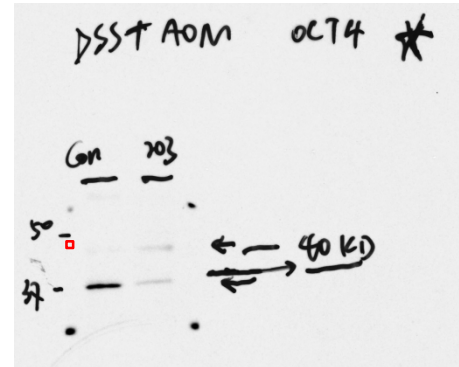

Nanog

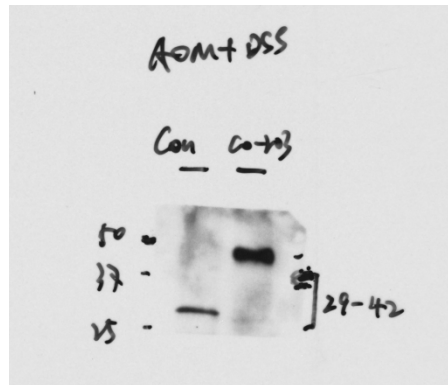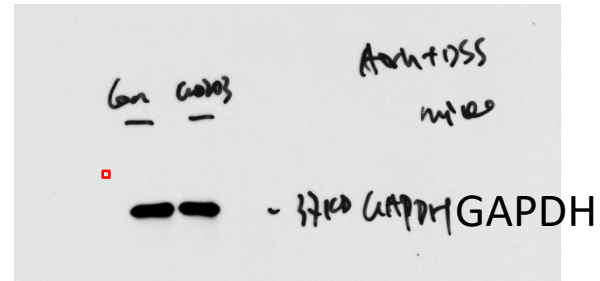

# Full unedited gel for Figure 5A

MUC1-C

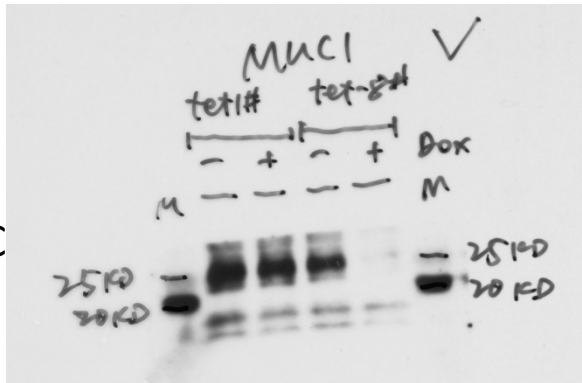

LGR5

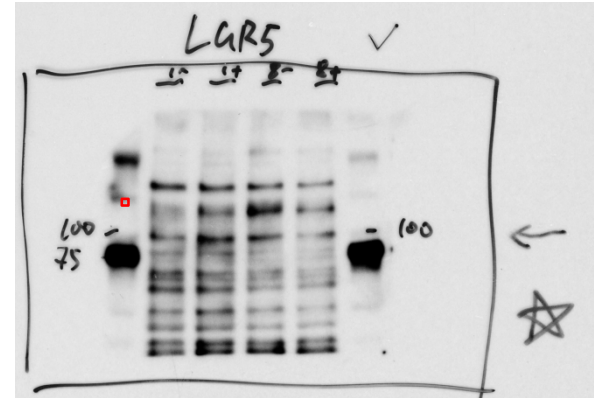

BMI1

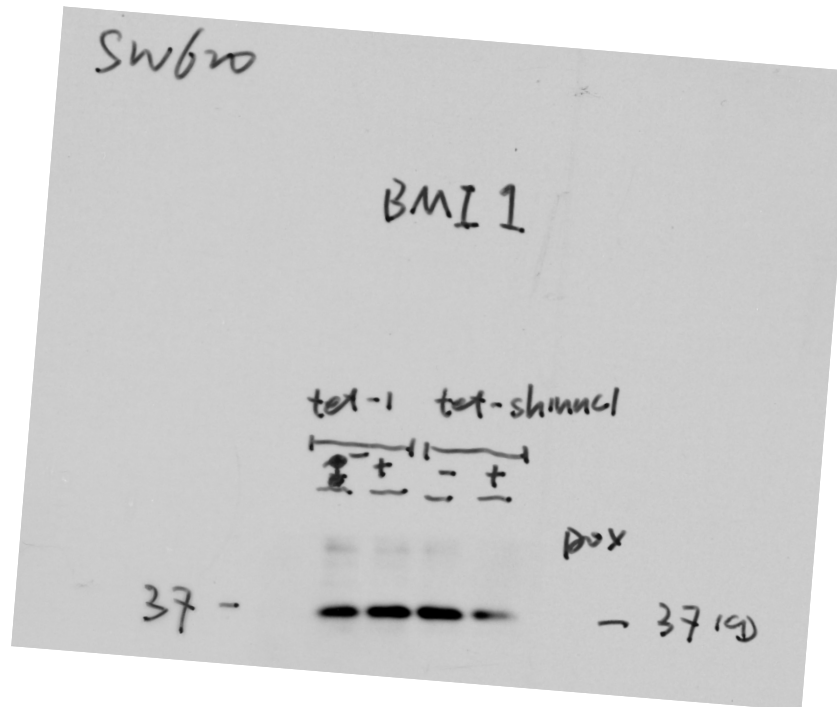

# Full unedited gel for Figure 5A

ALDH1

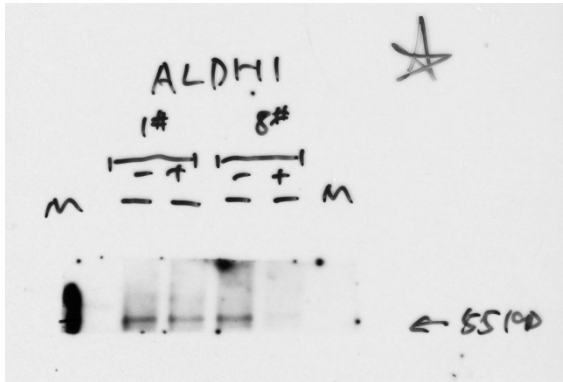

FOXA1

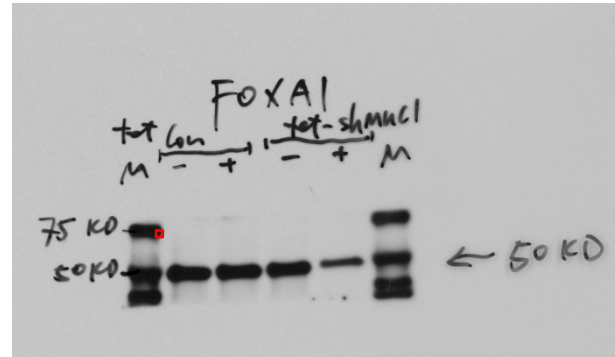

LIN28B

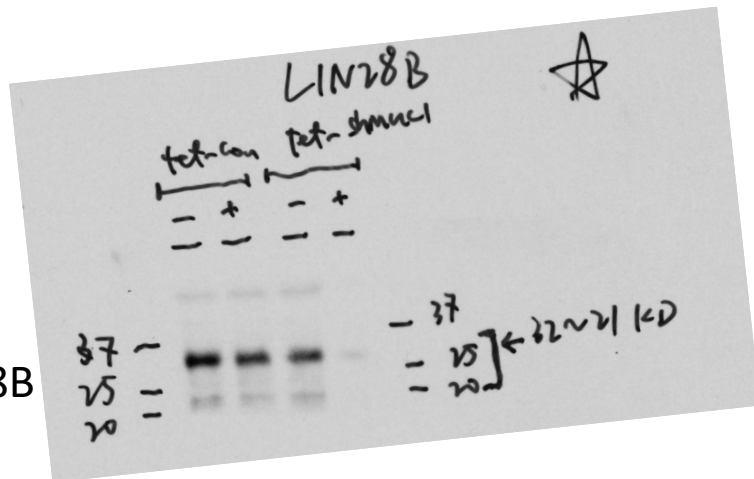

GAPDH

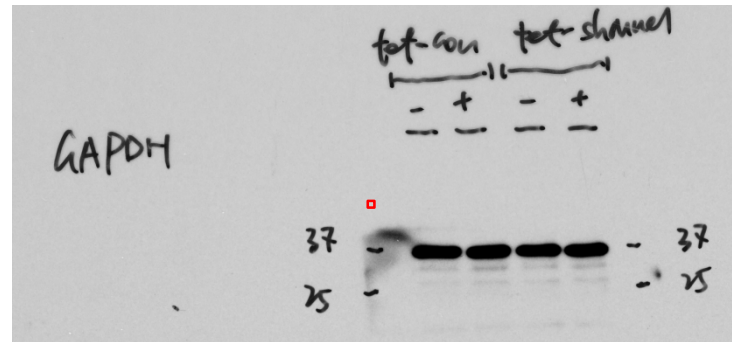

# Full unedited gel for Figure 5C

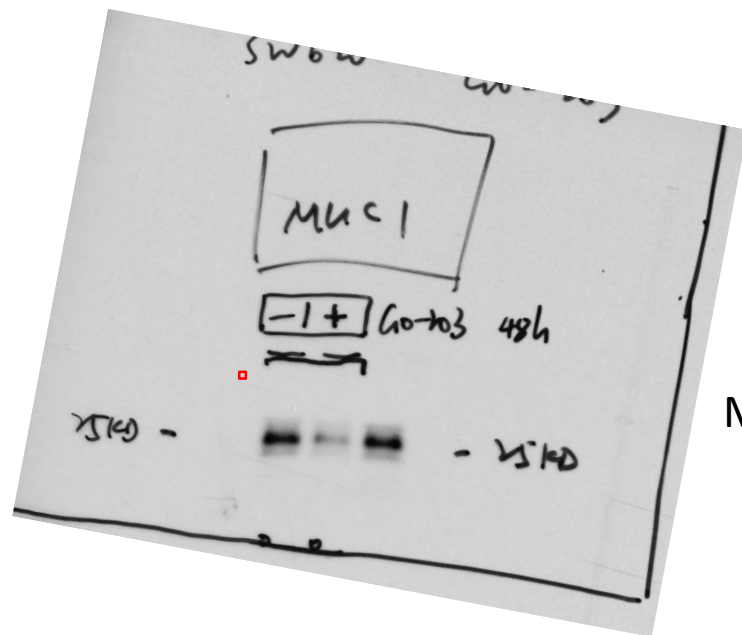

MUC1-C

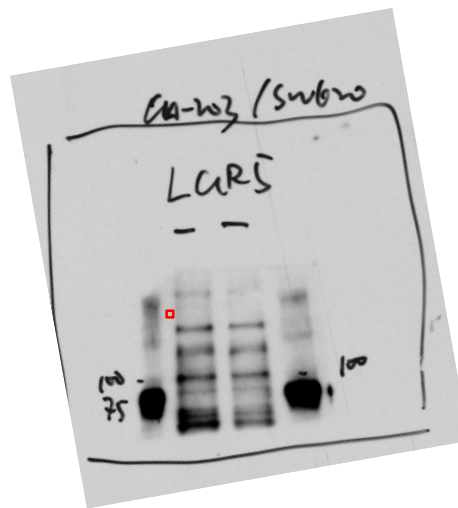

LGR5

BMI1

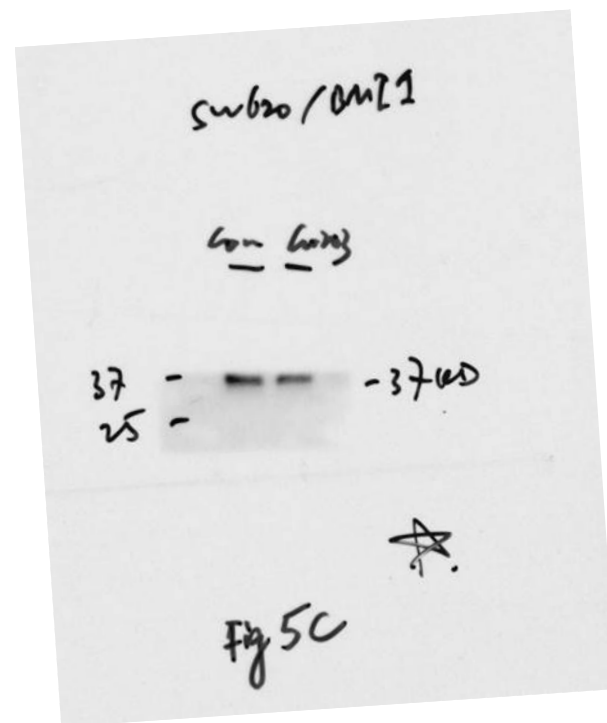

# Full unedited gel for Figure 5C

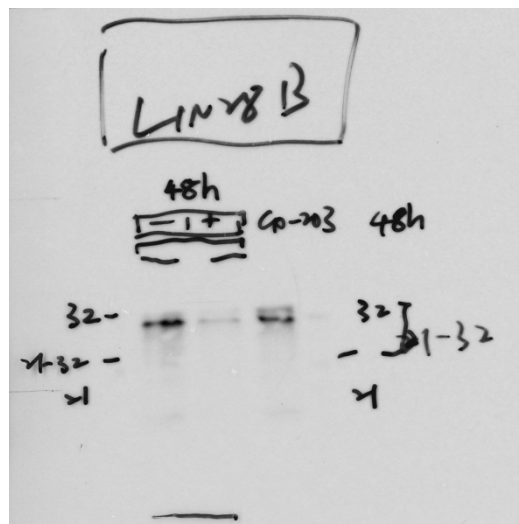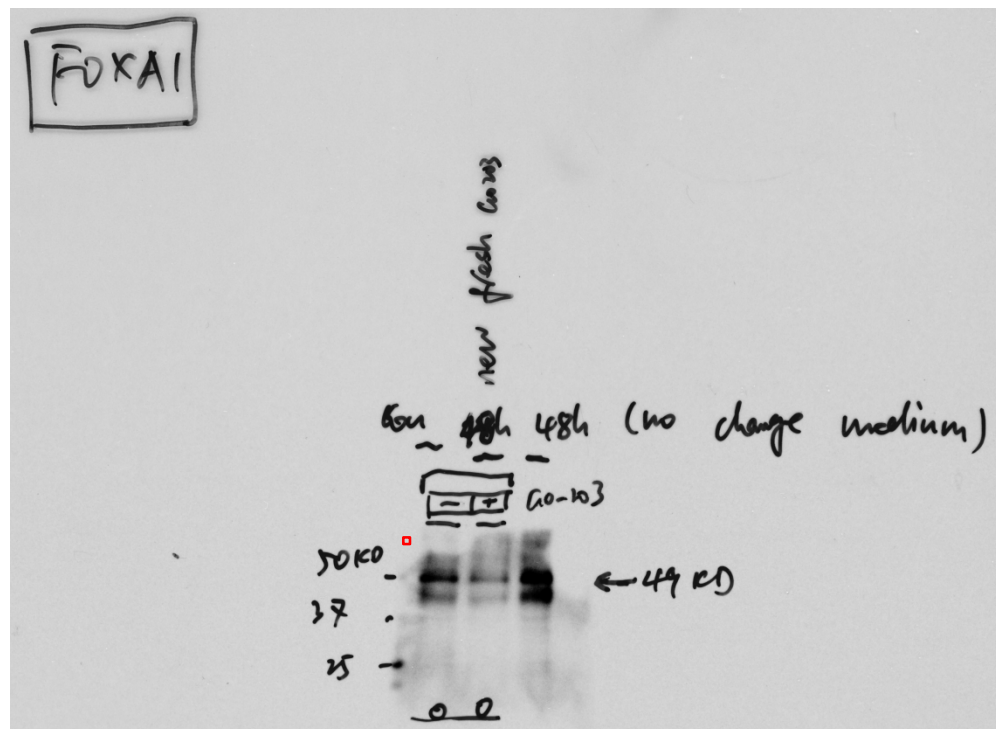

FOXA1

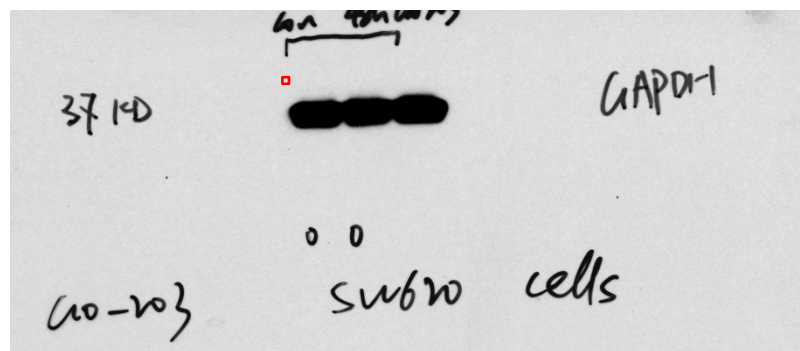

# Full unedited gel for Figure 6B

MUC1-C

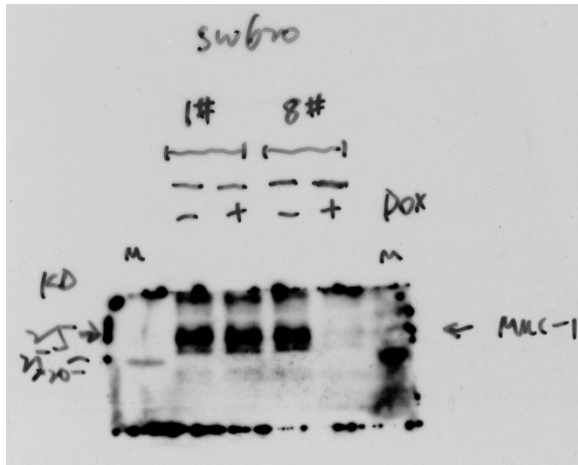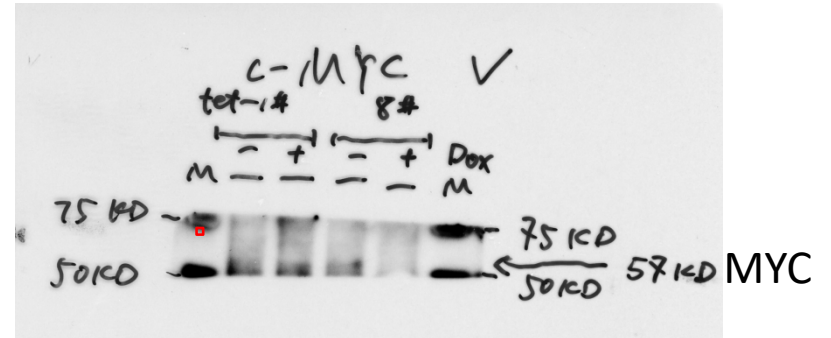

GAPDH

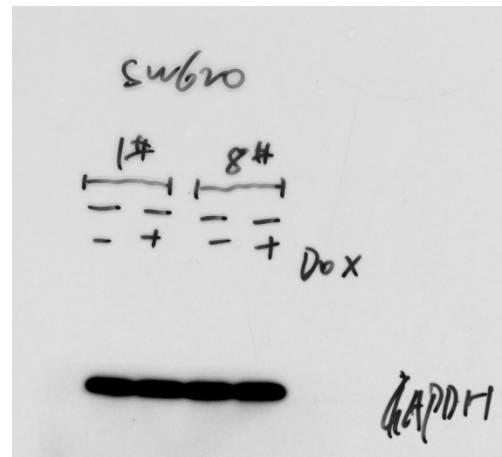

Fig 6C

MYC

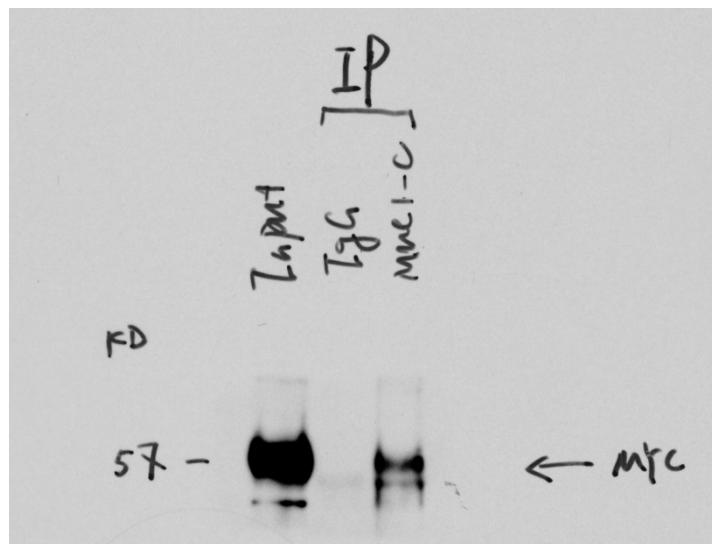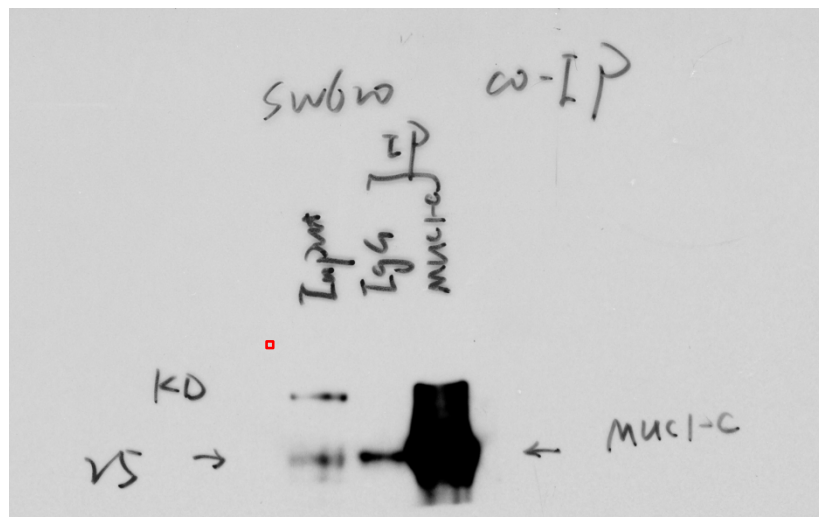

MUC1-C

# Full unedited gel for Figure 6D

MYC

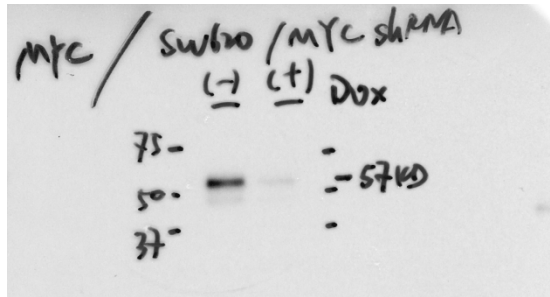

LGR5

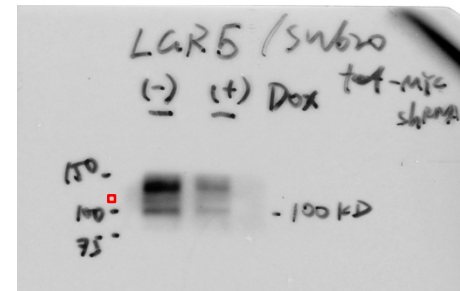

BMI1

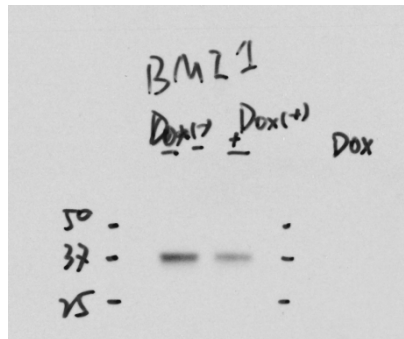

GAPDH

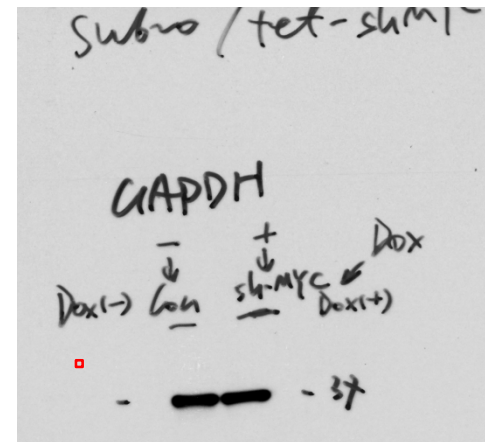

# Full unedited gel for Figure 7A

OCT4

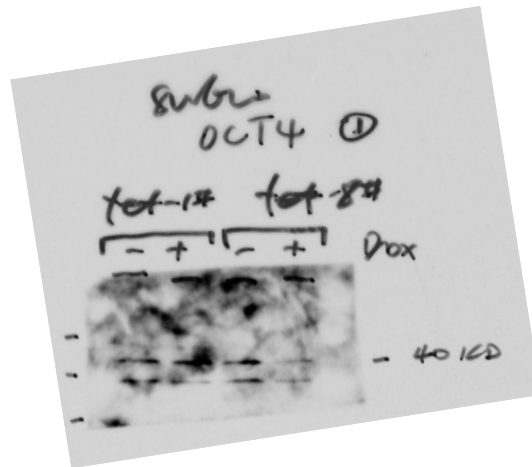

SOX2

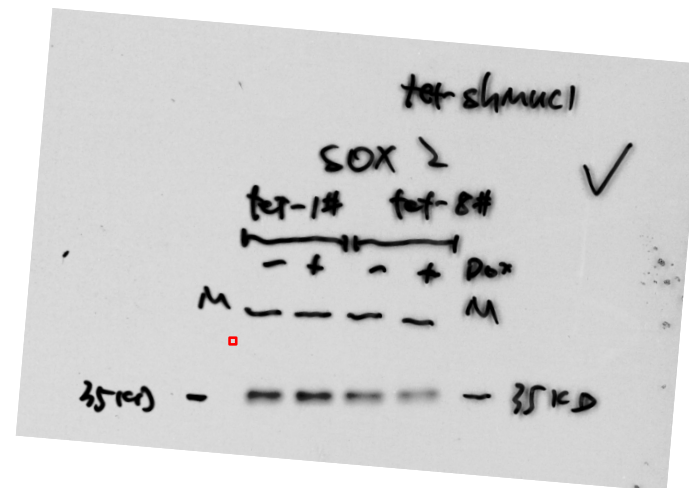

NANOG

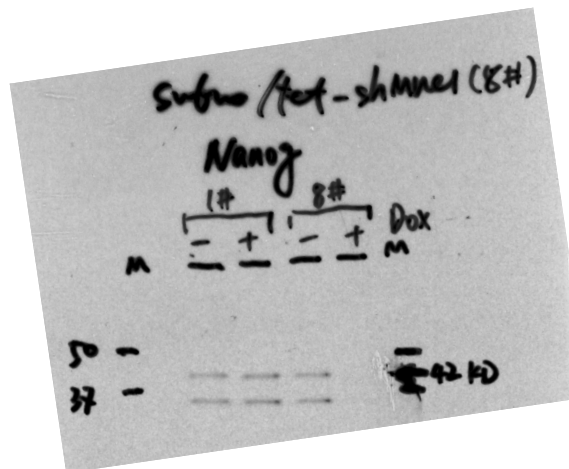

GAPDH

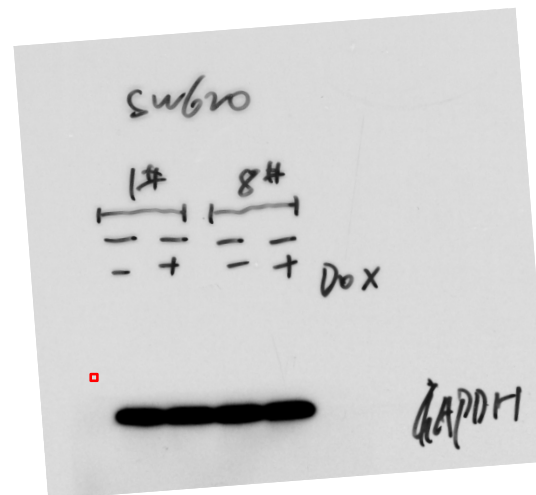

# Full unedited gel for Figure 7B

OCT4

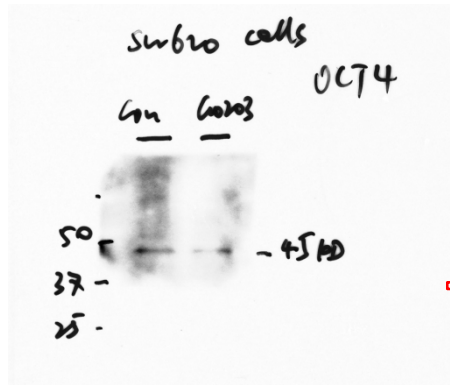

SOX2

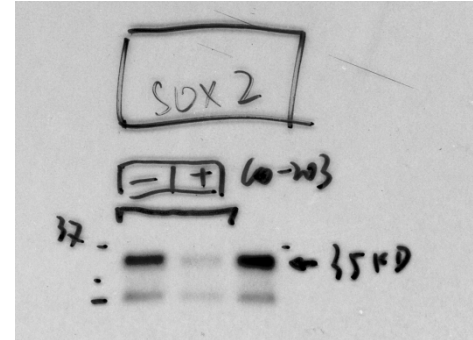

NANOG

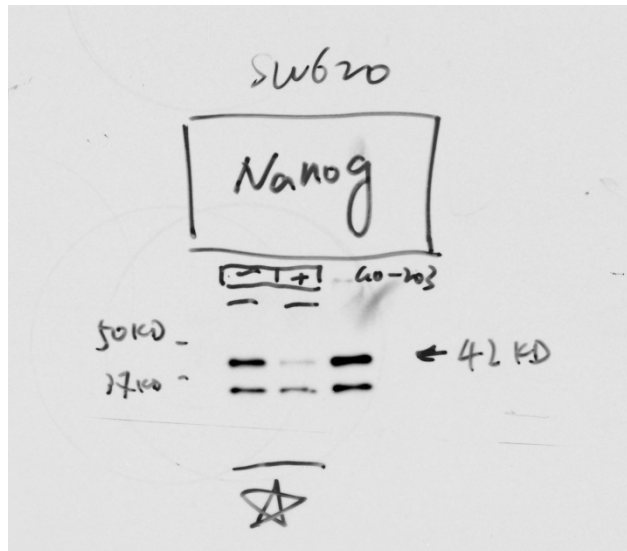

GAPDH

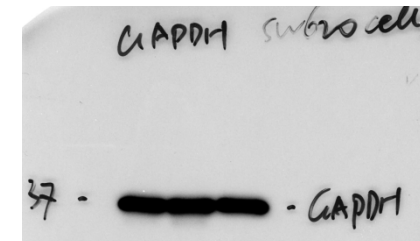

# Full unedited gel for Figure 7C

OCT4

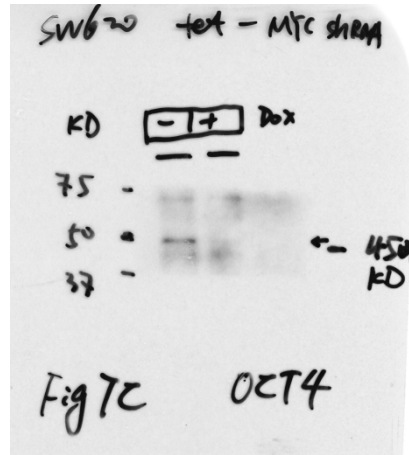

SOX2

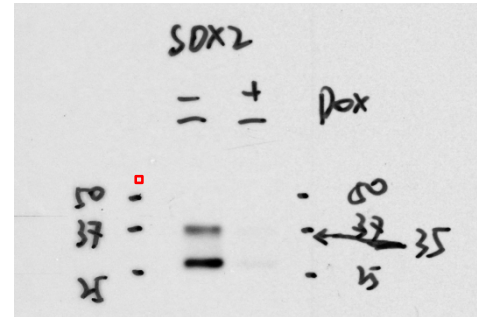

NANOG

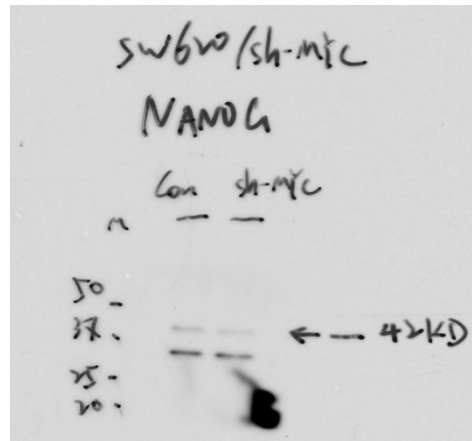

GAPDH

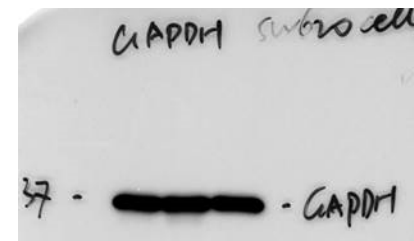

Full unedited gel  
for Figure 7E

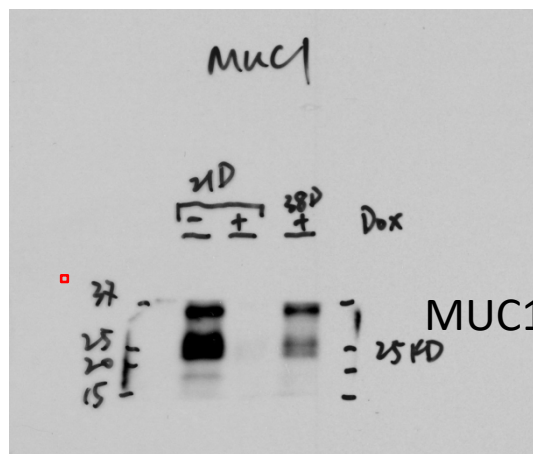

BMI1

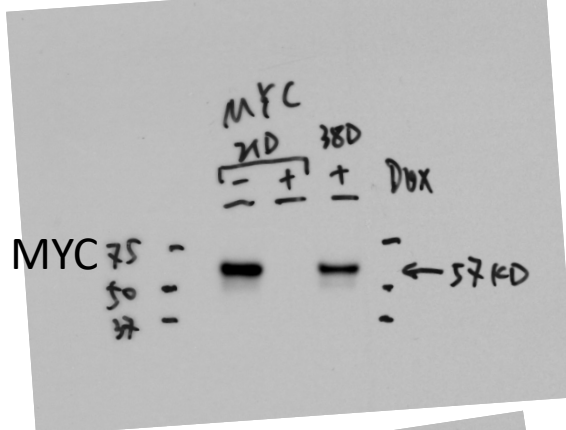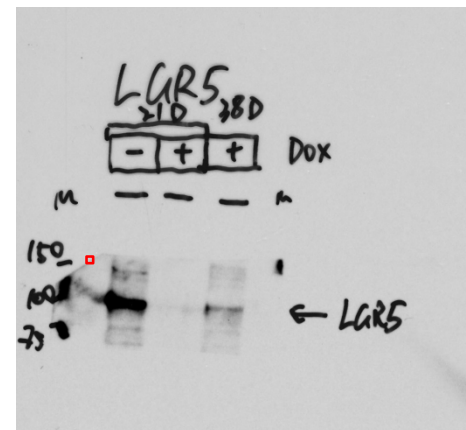

LGR5

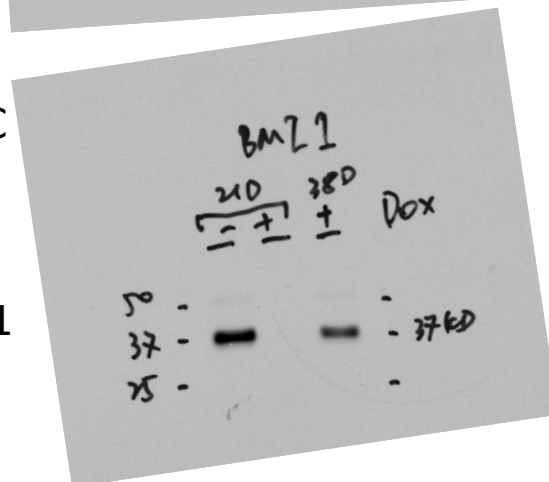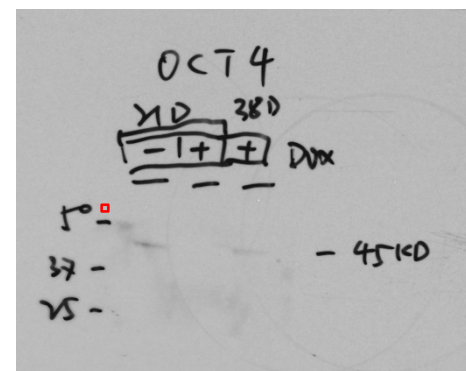

OCT4

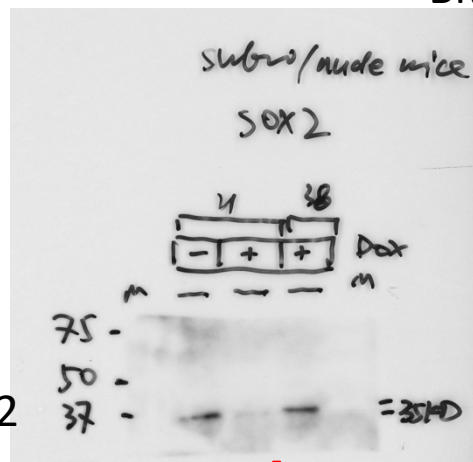

NANOG

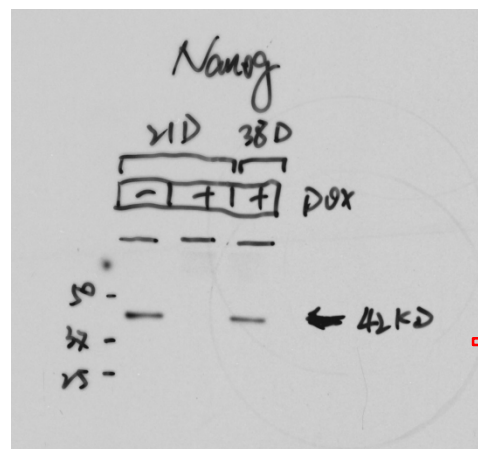

GAPDH

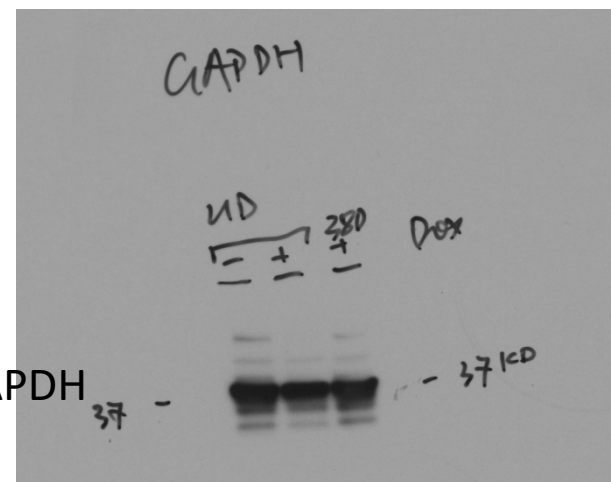

SOX2

# Full unedited gel for SUPP Figure S4A

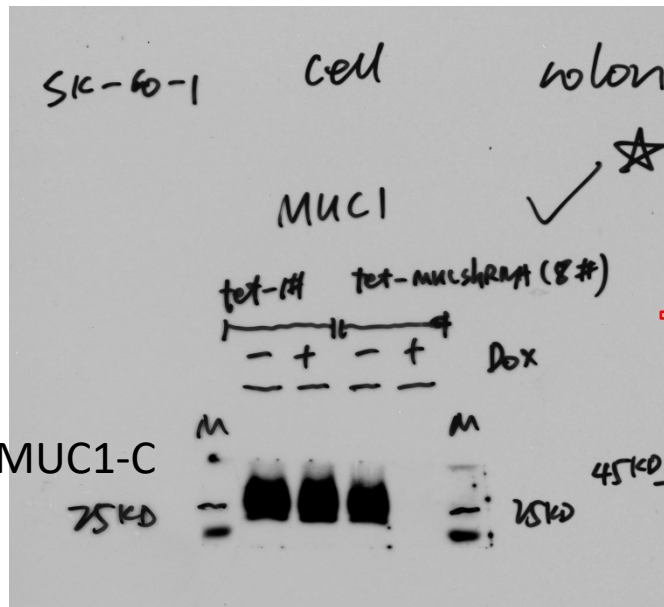

LGR5

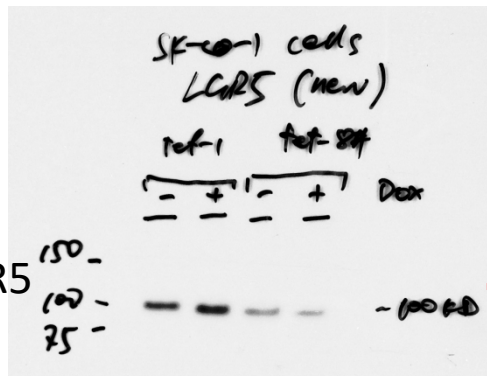

BMI1

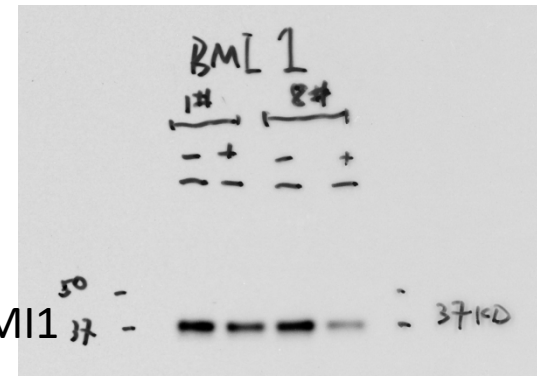

ALDH1

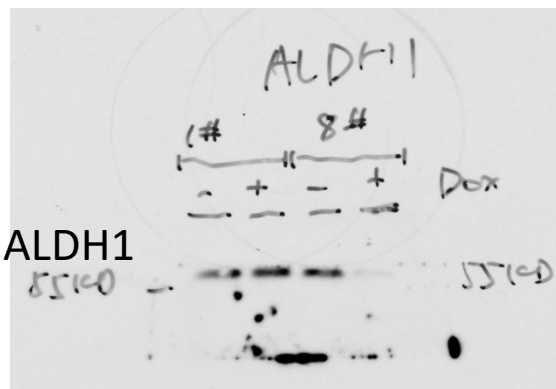

FOXA1

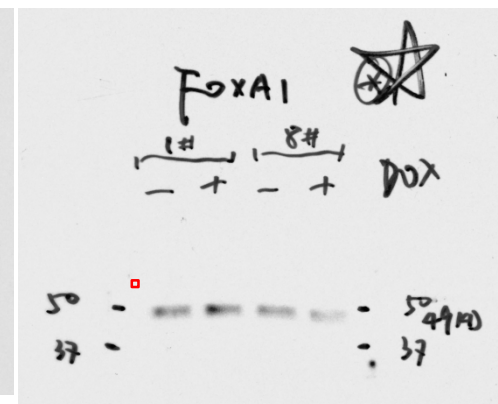

LIN28B

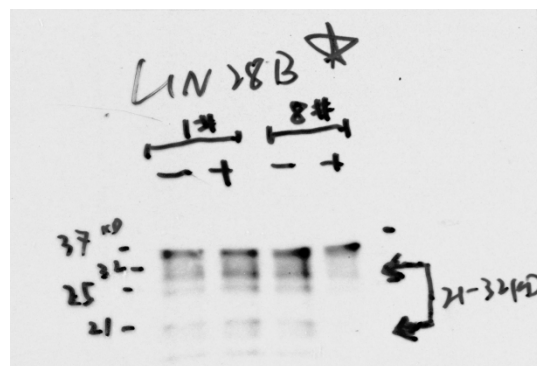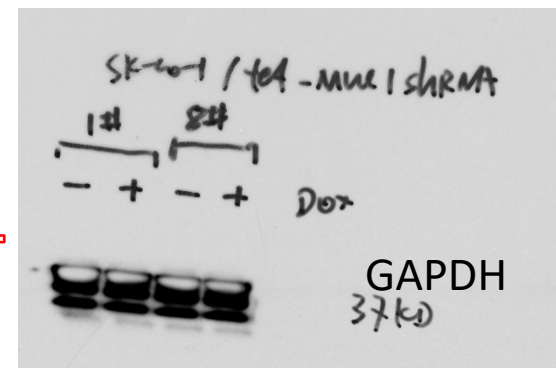

# Full unedited gel for SUPP Figure S4B

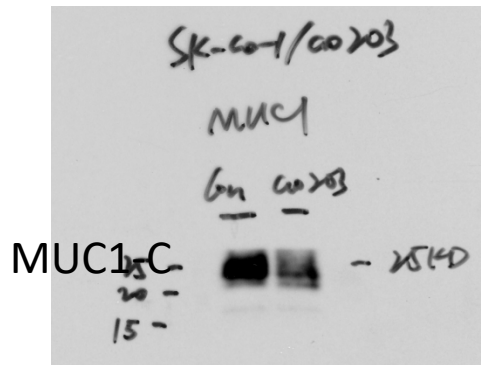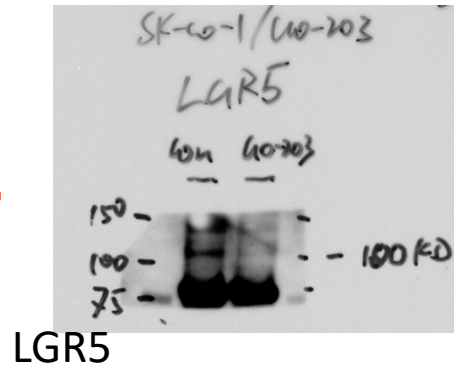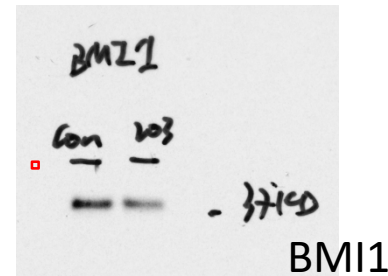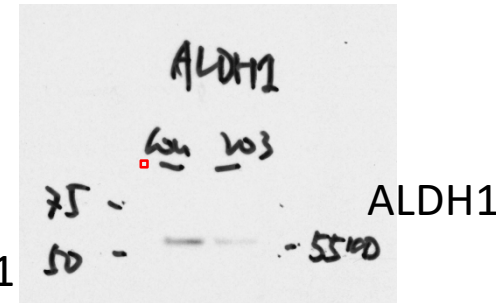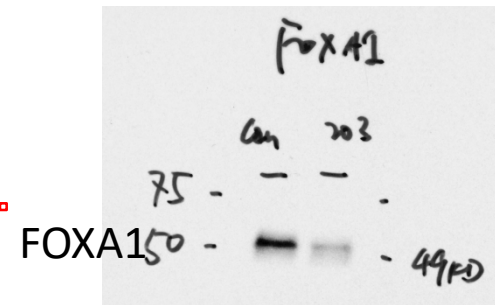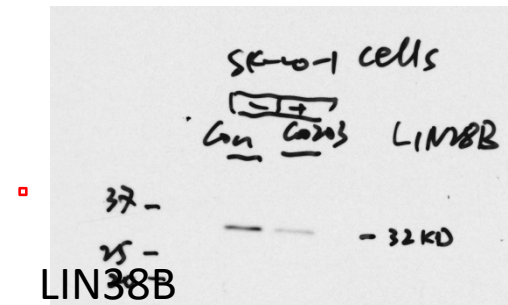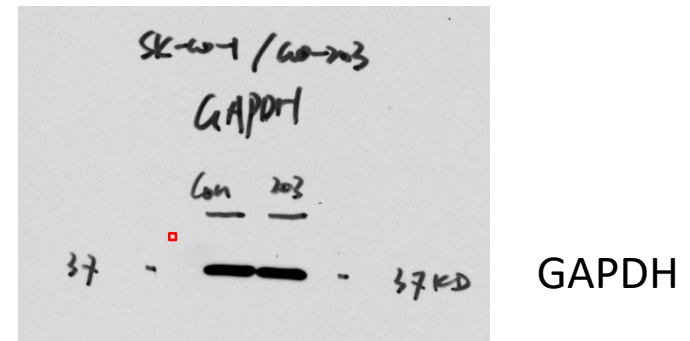

# Full unedited gel for SUPP Figure S5B

MUC1-C

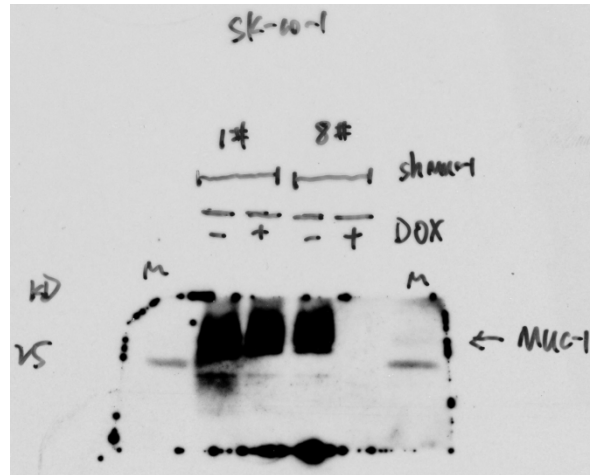

MYC

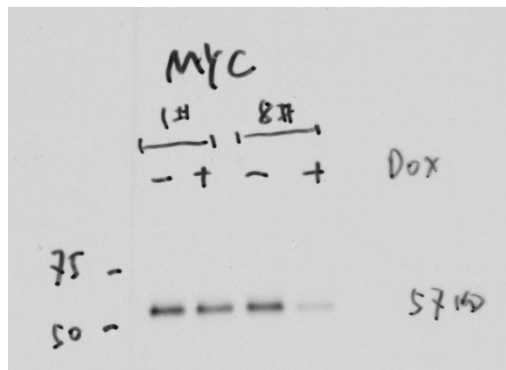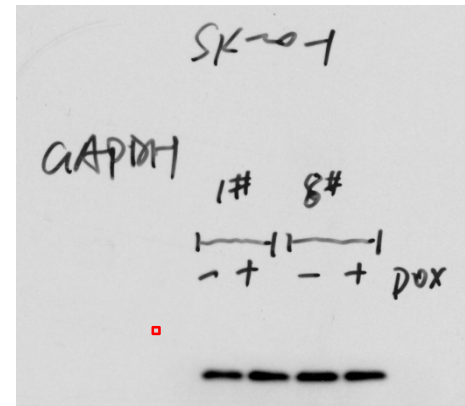

GAPDH

# Full unedited gel for SUPP Figure S5D

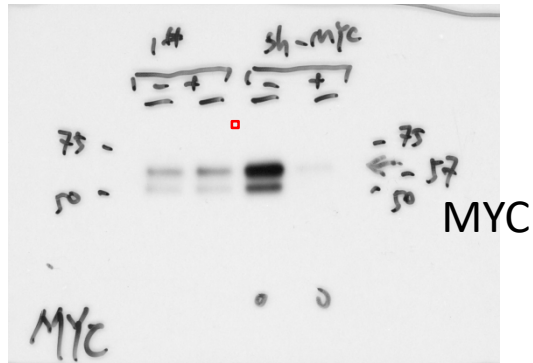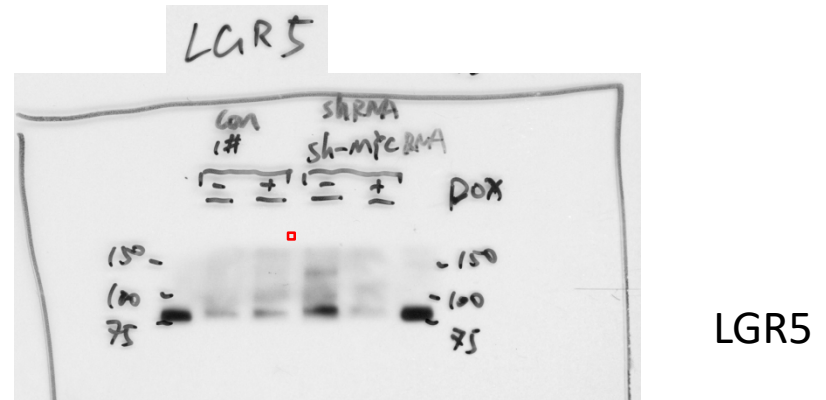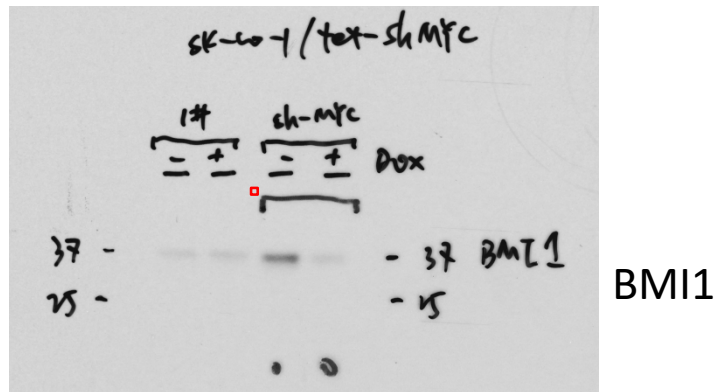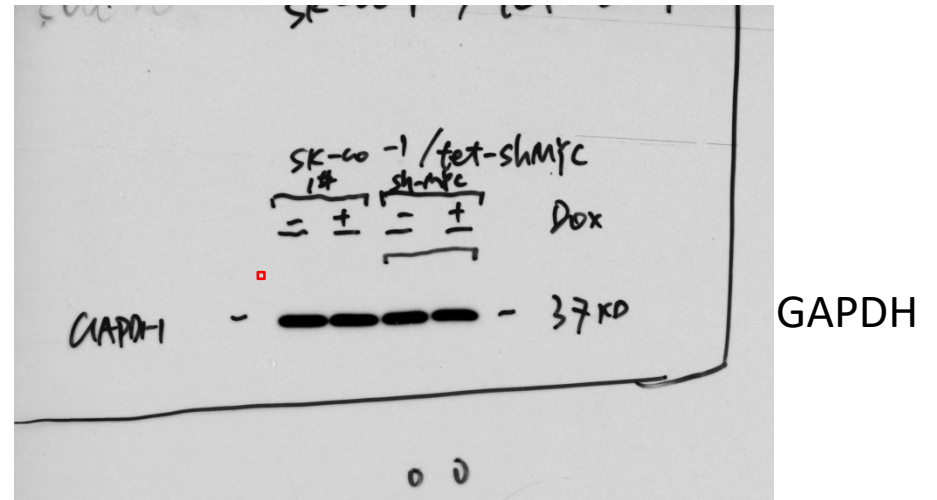

# Full unedited gel for SUPP Figure S6A

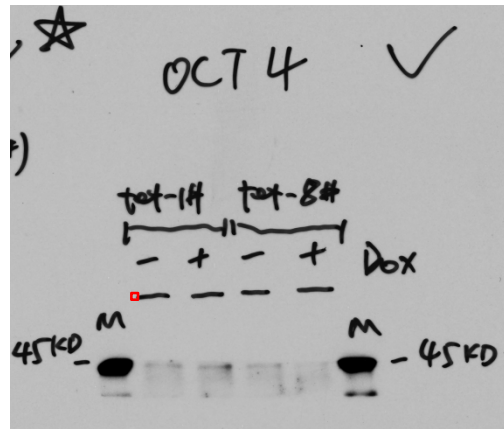

OCT4

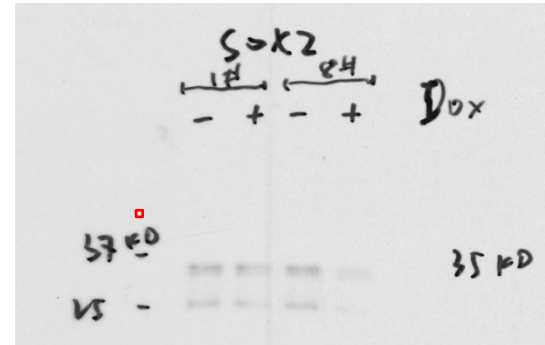

SOX2

NANOG

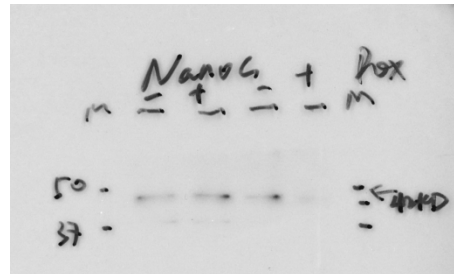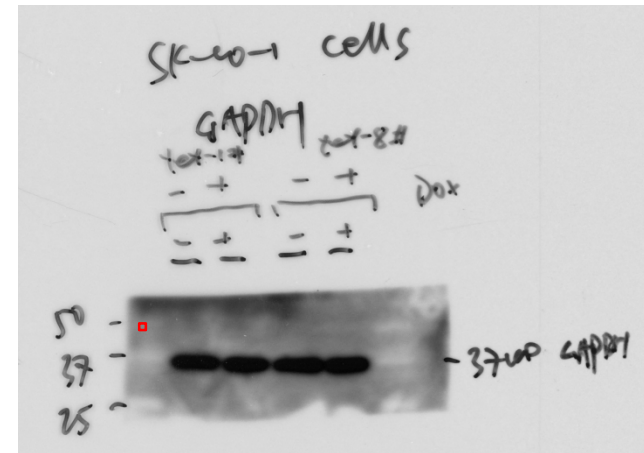

GAPDH

Full unedited gel for SUPP Figure S6B

OCT4

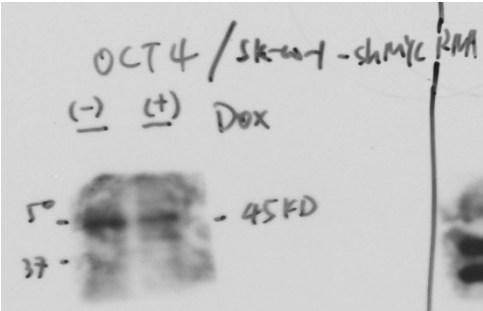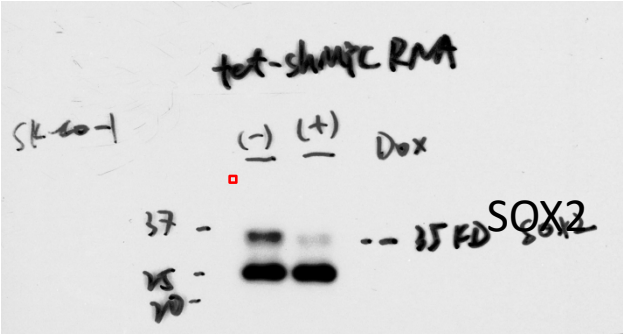

NANOG

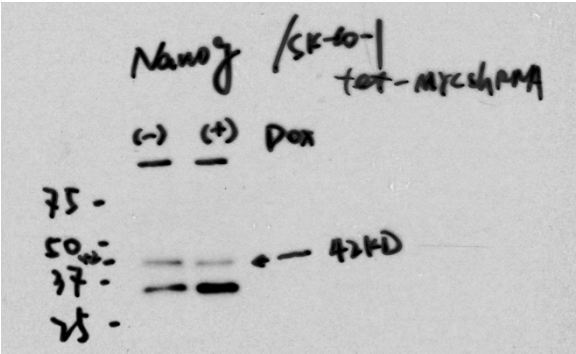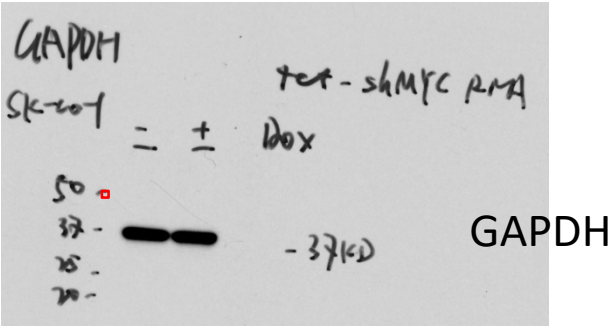

# Full unedited gel for SUPP Figure S7B

MUC1-C

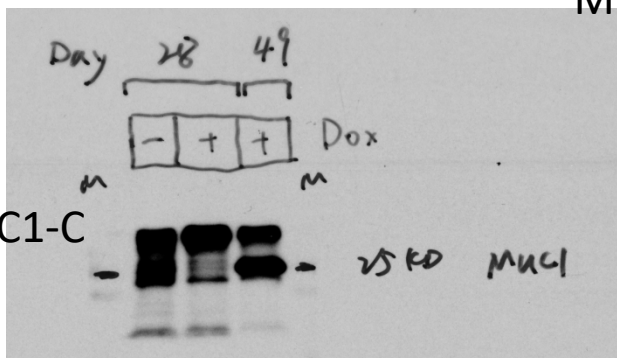

MYC

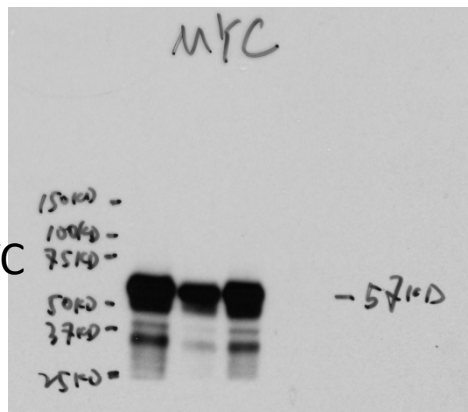

OCT4

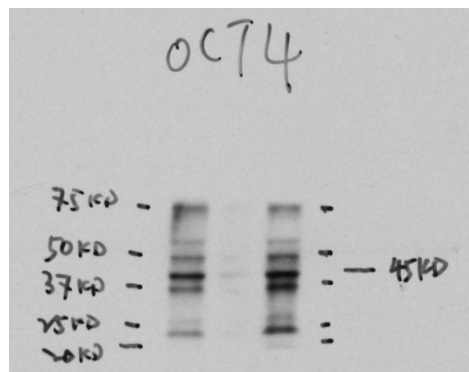

BMI1

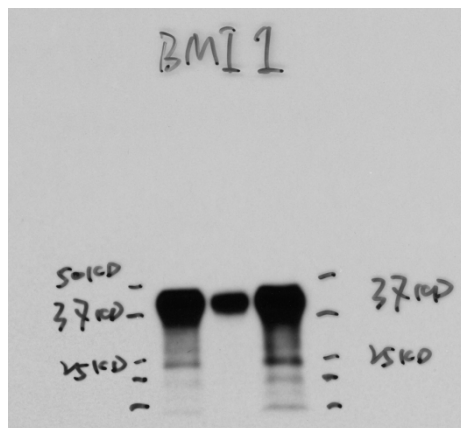

NANOG

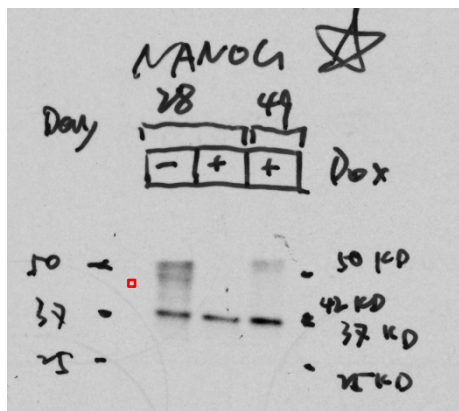

SK-GO-1/tet-shMUC1 RNA  
LGR5  
28D 49D  
- + + DOX

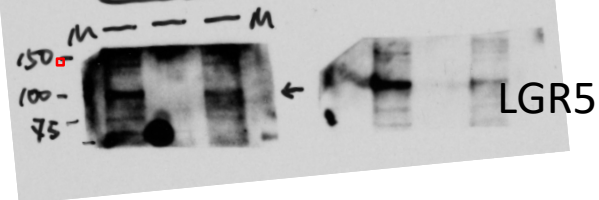

LGR5

SOX2 ★  
Day 28 49  
- + + DOX

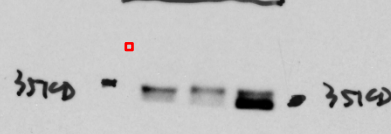

SOX2

GAPDH

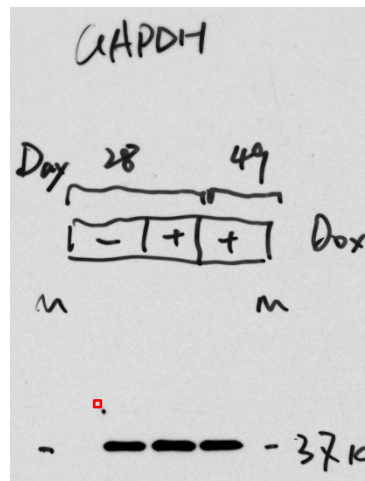

GAPDH
